# Supplementary material for: RNA‐Cleaving Deoxyribozymes Differentiate Methylated Cytidine Isomers in RNA
Source: PubMed Central journal article supplement — Angew Chem Int Ed Engl. 2021 Jul 26;60(35):19058–62. doi: 10.1002/anie.202106517 (PMC8457104; doi:10.1002/anie.202106517), 2021-07-26
Supplement: ANIE-60-19058-s001.pdf [file ANIE-60-19058-s001.pdf]

Supporting Information

**RNA-Cleaving Deoxyribozymes Differentiate Methylated Cytidine Isomers in RNA**

*Anam Liaqat<sup>†</sup>, Maksim V. Sednev<sup>†</sup>, Carina Stiller, and Claudia Höbartner\**

anie\_202106517\_sm\_miscellaneous\_information.pdf

## SUPPORTING INFORMATION

## Table of Contents

|                                                                                                                                                                                                                         |    |
|-------------------------------------------------------------------------------------------------------------------------------------------------------------------------------------------------------------------------|----|
| General information.....                                                                                                                                                                                                | 3  |
| Synthesis of m <sup>3</sup> C phosphoramidite.....                                                                                                                                                                      | 3  |
| <i>N</i> <sup>3</sup> -Methylcytidinium methyl sulfate.....                                                                                                                                                             | 4  |
| <i>N</i> <sup>4</sup> -Benzoyl- <i>N</i> <sup>3</sup> -methylcytidine .....                                                                                                                                             | 4  |
| <i>N</i> <sup>4</sup> -Benzoyl-5'- <i>O</i> -(4,4'-dimethoxytrityl)- <i>N</i> <sup>3</sup> -methylcytidine.....                                                                                                         | 4  |
| <i>N</i> <sup>4</sup> -Benzoyl-5'- <i>O</i> -(4,4'-dimethoxytrityl)- <i>N</i> <sup>3</sup> -methyl-2'- <i>O</i> -{[(triisopropylsilyl)oxy]methyl}cytidine .....                                                         | 5  |
| <i>N</i> <sup>4</sup> -Benzoyl-5'- <i>O</i> -(4,4'-dimethoxytrityl)- <i>N</i> <sup>3</sup> -methyl-2'- <i>O</i> -{[(triisopropylsilyl)oxy]methyl}cytidine 3'- <i>O</i> -(2-cyanoethyl diisopropylphosphoramidite) ..... | 5  |
| Solid-phase synthesis of oligoribonucleotides .....                                                                                                                                                                     | 5  |
| Labeling of oligonucleotides.....                                                                                                                                                                                       | 6  |
| Labeling of 5'-alkyne functionalized oligonucleotides .....                                                                                                                                                             | 6  |
| Labeling of RNA at 3'-end .....                                                                                                                                                                                         | 6  |
| Radioactive labeling of RNA at 5'-end .....                                                                                                                                                                             | 6  |
| Ribozyme-catalyzed fluorescent labeling of RNA .....                                                                                                                                                                    | 6  |
| In-vitro selection .....                                                                                                                                                                                                | 6  |
| Phosphorylation of RNA substrates for selection .....                                                                                                                                                                   | 6  |
| Splinted ligation of RNA substrate and deoxyribozyme library .....                                                                                                                                                      | 6  |
| Intramolecular cleavage of RNA-DNA hybrids (key selection step) .....                                                                                                                                                   | 7  |
| PCR amplification of the enriched DNA library .....                                                                                                                                                                     | 7  |
| Cloning and sequencing .....                                                                                                                                                                                            | 8  |
| Kinetics characterization of deoxyribozyme-catalyzed RNA cleavage .....                                                                                                                                                 | 8  |
| Synthesis and analysis of mt-tRNAs.....                                                                                                                                                                                 | 8  |
| Supporting Tables .....                                                                                                                                                                                                 | 9  |
| Table S1. Sequences of RNA oligonucleotides .....                                                                                                                                                                       | 9  |
| Table S2. Sequences of DNA oligonucleotides .....                                                                                                                                                                       | 9  |
| Table S3. Summary of enrichment data and cleavage activity for deoxyribozymes reported in this study .....                                                                                                              | 11 |
| Supporting figures .....                                                                                                                                                                                                | 13 |
| Figure S1. Schematic of in-vitro selection of RNA-cleaving deoxyribozymes .....                                                                                                                                         | 13 |
| Figure S2. Progress of in-vitro selection .....                                                                                                                                                                         | 13 |
| Figure S3. PAGE analysis of RNA cleavage mediated by deoxyribozymes AL112, AM101 and AN05 .....                                                                                                                         | 14 |
| Figure S4. HR-ESI-MS analysis of cleaved products for AL112, AM101, AN05 and AK104 .....                                                                                                                                | 14 |
| Figure S5. Activity assays for deoxyribozyme AL112 .....                                                                                                                                                                | 15 |
| Figure S6. Activity assays for deoxyribozyme AM101 .....                                                                                                                                                                | 15 |
| Figure S7. Activity assays for deoxyribozyme AM101 with m <sup>4</sup> C and m <sup>4,4</sup> C.....                                                                                                                    | 16 |
| Figure S8. Activity assays for deoxyribozyme AN05.....                                                                                                                                                                  | 16 |
| Figure S9. Activity assays for deoxyribozyme AN05 with m <sup>5</sup> C, hm <sup>5</sup> C and f <sup>5</sup> C .....                                                                                                   | 17 |
| Figure S10. Activity assays for deoxyribozyme AK104.....                                                                                                                                                                | 17 |
| Figure S11. Activity assays for deoxyribozyme AK104 with rC16 mutants .....                                                                                                                                             | 17 |
| Figure S12. Activity assays for deoxyribozymes with increasing Mg <sup>2+</sup> concentrations .....                                                                                                                    | 18 |
| Figure S13. Activity assays for deoxyribozyme in presence of Mn <sup>2+</sup> .....                                                                                                                                     | 19 |
| NMR Spectra.....                                                                                                                                                                                                        | 20 |
| References .....                                                                                                                                                                                                        | 25 |

## SUPPORTING INFORMATION

## General information

DNA oligonucleotides were purchased from Microsynth. RNA oligonucleotides R1–R26 (Table S1) were prepared by solid-phase synthesis using 5'-O-DMT-2'-O-TOM-protected 3'-β-cyanoethyl phosphoramidites of *N*<sup>6</sup>-acetyladenosine, *N*<sup>4</sup>-acetylcytidine, *N*<sup>2</sup>-acetylguanosine and uridine (purchased from Chemgenes), *N*<sup>4</sup>-methylcytidine (synthesized according to the known procedure<sup>[1]</sup>), *N*<sup>3</sup>-methylcytosine (prepared using the procedure described below), 5'-O-DMT-2'-O-TBDMS-*N*<sup>4</sup>-benzoyl-5-methylcytidine 3'-β-cyanoethyl phosphoramidite (from Chemgenes), and (2-cyanoethoxy)-5-hexyn-1-yl-*N,N*-diisopropylaminophosphine (prepared according to the known procedure<sup>[2]</sup>). *N*<sup>4</sup>,*N*<sup>4</sup>-Dimethylcytidine-modified RNA oligonucleotide R27 was prepared by solid-phase synthesis using 2'-O-TOM-protected ribonucleoside phosphoramidites for unmodified positions and “convertible” 5'-O-(4,4'-Dimethoxytrityl)-2'-O-(triisopropylsilyloxy)methyl-*O*<sup>4</sup>-(4-chlorophenyl)uridine 3'-(2-cyanoethyl-*N,N*-diisopropylphosphoramidite) (prepared according to the known procedure<sup>[3]</sup>) for the modified position followed by conversion of the resulting *O*<sup>4</sup>-chlorophenyluridine-modified RNA with *N,N*-dimethylamine (see below for the conditions). RNA oligonucleotides R28–R34 were prepared by in vitro transcription from the corresponding DNA templates. Fluorescein thiosemicarbazide was purchased from Sigma-Aldrich. 6-FAM-azide, *N*<sup>6</sup>-(6-aminoethyl)-ATP-6-FAM, *N*<sup>6</sup>-(6-aminoethyl)-ATP-Cy3, *N*<sup>6</sup>-(6-aminoethyl)-ATP-ATTO-647N, nucleotide triphosphates (NTPs) and deoxyribonucleotide triphosphates (dNTPs) were purchased from Jena Bioscience. m<sup>5</sup>CTP, hm<sup>5</sup>CTP and f<sup>5</sup>CTP were purchased from TriLink Biotechnologies. T4 PNK, T4 DNA Ligase, and DreamTaq polymerase were purchased from Thermo Fisher Scientific. γ-<sup>32</sup>P-Adenosine 5'-triphosphate (γ-<sup>32</sup>P-ATP) was purchased from Hartmann Analytic. All DNA and RNA oligonucleotides were purified by denaturing PAGE (10–20% acrylamide/bis-acrylamide 19:1, 7 M urea) with running buffer 1x TBE (89 mM Tris, 89 mM boric acid and 2 mM EDTA, pH 8.3), extracted by crush and soak into TEN buffer (10 mM Tris-HCl, pH 8.0, 1 mM EDTA, 300 mM NaCl) and recovered by precipitation with ethanol. For preparative gels, oligonucleotides were visualized by UV shadowing on a TLC plate. Fluorescence gel images were recorded with a Biorad ChemiDoc MP using epi illumination. Analytical anion-exchange HPLC was carried out on a GE Healthcare Life Sciences ÄKTA™ micro system using DNAPac™ PA200 columns (4 x 250 mm, Thermo Scientific) at 60 °C. Solvent A: 25 mM Tris-HCl (pH 8.0), 6 M Urea. Solvent B: 25 mM Tris-HCl (pH 8.0), 6 M Urea, 0.5 M NaClO<sub>4</sub>. Gradient: linear, 0–54% solvent B, 4% solvent B per 1 CV. The solvents were filtered through 0.2 μm cellulose acetate filters (Sartorius, Germany) prior to usage. HR-ESI-MS spectra of the synthetic products and oligonucleotides were recorded on a Bruker micrOTOF-Q III spectrometer.

Synthesis of m<sup>3</sup>C phosphoramidite

All synthetic procedures were performed under nitrogen atmosphere. The chemicals were purchased 'Pro analysis'- or 'For synthesis' grade and used without additional purification. Dry solvents (DCM, MeCN, DMF, THF) were obtained in a solvent purification system (SPS). DCE was dried over molecular sieves. Solvents for column chromatography (technical quality) were distilled prior to use. The obtained compounds were stored at 4 °C (-20 °C in case of TOM-protected compounds and the final phosphoramidite). Column chromatography was performed on silica gel (Kieselgel 60, Merck, 0.040-0.063 mm). TLC was performed on Alugram DIL G/UV254 (Machery-Nagel, UV visualization, 254 nm). NMR spectra were recorded on a Bruker Avance III HD 400 spectrometer. Chemical shifts are reported relative to the residual solvent signals. CDCl<sub>3</sub>: 7.26 ppm (<sup>1</sup>H), 77.16 ppm (<sup>13</sup>C). DMSO: 2.50 ppm (<sup>1</sup>H), 39.52 ppm (<sup>13</sup>C).

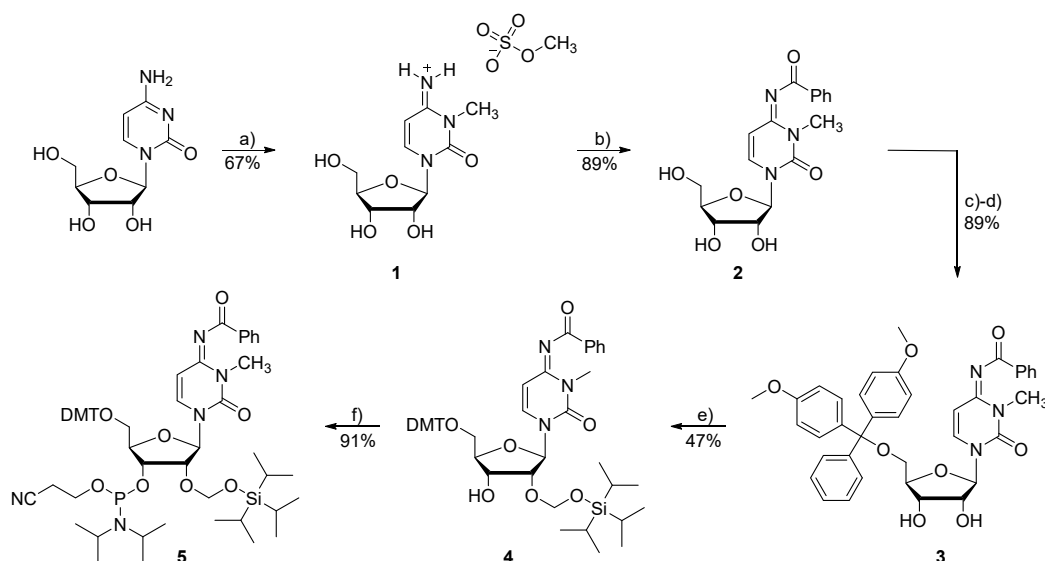

**Scheme S1.** Synthesis of m<sup>3</sup>C phosphoramidite. a) DMF, dimethyl sulfate, 37 °C, 30 min. b) TMSCl, pyridine, 1 h, r.t., then NEt<sub>3</sub>, BzCl, 4 h, r.t. c) DMF-DMA, pyridine, o.n., r.t. d) DMT-Cl, pyridine, r.t., 2 h. e) *i*Pr<sub>2</sub>NEt, *t*Bu<sub>2</sub>SnCl<sub>2</sub>, DCE, r.t., 1 h, then TOM-Cl, 80 °C, 20 min. f) Me<sub>2</sub>NEt, CEP-Cl, DCM, r.t.

## SUPPORTING INFORMATION

The synthesis of  $m^3C$ -phosphoramidite building block **5** was performed in five steps. The methyl group was introduced at position N3 of cytosine with dimethyl sulfate,<sup>[4]</sup> resulting in formation of salt **1**. The transient protection of the ribose hydroxy groups with TMSCl, allowed selective protection of the amino group with benzoyl chloride to obtain compound **2**.<sup>[5]</sup> In the next step, the 2'- and 3'-hydroxy groups of compound **2** were transiently protected as acetal with DMF-DMA, and the 5'-hydroxy group was selectively protected upon reaction with DMT-Cl. Compound **3** was then activated with  $t\text{Bu}_2\text{SnCl}_2$  and treated with TOM-Cl to yield compound **4**. Finally, compound **4** was treated with CEP-Cl to afford  $m^3C$  phosphoramidite **5**.

*N*<sup>3</sup>-Methylcytidinium methyl sulfate (1)

As described earlier,<sup>[4]</sup> cytidine (500 mg, 2.06 mmol, 1.00 eq.) was suspended in anhydrous dimethylformamide (5 mL) and warmed to 37 °C under nitrogen atmosphere. Afterwards, dimethyl sulfate (2.00 mL, 21.1 mmol, 10.2 eq.) was added. After 30 min stirring, the resulting clear solution was diluted to 20 mL with methanol, and ethyl acetate was added until a precipitate formed. The title compound was obtained by filtration as a colorless solid (510 mg, 1.38 mmol, 67%).

<sup>1</sup>H NMR (MeOD, 400 MHz):  $\delta$  (ppm) = 3.50 (s, 3H, N-CH<sub>3</sub>), 3.68 (s, 3H, -OS(O)<sub>2</sub>OCH<sub>3</sub>), 3.78 (dd, J = 12.4, 2.5 Hz; 1H, H<sup>1-5'</sup>), 3.94 (dd, J = 12.4, 2.5 Hz; 1H, H<sup>2-5'</sup>), 4.08 (dt, J = 6.1, 2.5 Hz; 1H, H-4'), 4.15 (dd, J = 6.1, 4.9 Hz; 1H, H-3'), 4.18 (dd, J = 4.9, 2.7 Hz; 1H, H-2'), 5.87 (d, J = 2.7 Hz; 1H, H-1'), 6.16 (d, J = 7.9 Hz; 1H, H-5), 8.50 (d, J = 7.9 Hz; 1H, H-6).

<sup>13</sup>C NMR (MeOD):  $\delta$  (ppm) = 30.93 (N-CH<sub>3</sub>), 55.11 (-OS(O)<sub>2</sub>OCH<sub>3</sub>), 61.15 (C5'), 70.09 (C3'), 76.28 (C2'), 86.22 (C4'), 93.05 (C1'), 94.75 (C5), 143.57 (C6), 149.13 (C=O), 161.29 (C=NH<sub>2</sub><sup>+</sup>).

HR-MS (ESI<sup>+</sup>): Exact mass calculated for C<sub>10</sub>H<sub>16</sub>N<sub>3</sub>O<sub>5</sub> [M+H]<sup>+</sup>: 258.1084, found: 258.1086.

*N*<sup>4</sup>-Benzoyl-*N*<sup>3</sup>-methylcytidine (2)

*N*<sup>3</sup>-Methylcytidinium methyl sulfate **1** (395 mg, 1.07 mmol, 1.00 eq.) was treated with trimethylsilyl chloride (TMSCl, 528  $\mu$ L, 4.17 mmol, 3.90 eq.) in anhydrous pyridine (7 mL) under nitrogen atmosphere. After stirring for 1 h, triethylamine (297  $\mu$ L, 2.14 mmol, 2.00 eq.) was added, and the reaction mixture was stirred for further 5 min at room temperature. Afterwards, benzoyl chloride (149  $\mu$ L, 1.28 mmol, 1.20 eq.) was added dropwise. After stirring for 4 h at room temperature, the reaction mixture was quenched with water (1.5 mL). The resulting mixture was stirred for 5 min at room temperature followed by addition of aqueous ammonia (2.6 mL). After further 15 min stirring, the volatiles were removed under reduced pressure. The crude residue was purified by column chromatography (DCM/MeOH, 20:1) to give the title compound as a colorless foam (344 mg, 952  $\mu$ mol, 89%).

<sup>1</sup>H NMR (MeOD, 400 MHz):  $\delta$  (ppm) = 3.54 (s, 3H, N-CH<sub>3</sub>), 3.74 (dd, J = 12.3, 2.9 Hz; 1H, H<sup>1-5'</sup>), 3.86 (dd, J = 12.3, 2.9 Hz; H<sup>2-5'</sup>), 4.02 (dt, J = 5.2, 2.9 Hz; 1H, H-4'), 4.15 (t, J = 5.2 Hz; 1H, H-3'), 4.19 (dd, J = 5.2, 4.0 Hz; 1H, H-2'), 5.94 (d, J = 4.0 Hz; 1H, H-1'), 6.41 (d, J = 8.2 Hz; 1H, H-5), 7.42–7.48 (m, 2H, bz), 7.53–7.58 (m, 1H, bz), 7.93 (d, J = 8.2 Hz; 1H, H-6), 8.09–8.13 (m, 2H, bz).

<sup>13</sup>C NMR (MeOD, 100 MHz):  $\delta$  (ppm) = 30.48 (N-CH<sub>3</sub>), 61.99 (C5'), 70.96 (C3'), 75.94 (C2'), 86.19 (C4'), 91.79 (C1'), 98.54 (C5), 129.34 (bz), 130.72 (bz), 133.71 (bz), 137.22 (C<sub>q</sub>-bz), 138.80 (C6), 151.94 (C2), 158.18 (C4), 179.35 (C=O).

HR-MS (ESI<sup>+</sup>): Exact mass calculated for C<sub>17</sub>H<sub>19</sub>N<sub>3</sub>NaO<sub>6</sub> [M+Na]<sup>+</sup>: 384.1166, found: 384.1171.

*N*<sup>4</sup>-Benzoyl-5'-O-(4,4'-dimethoxytrityl)-*N*<sup>3</sup>-methylcytidine (3)

Compound **2** (265 mg, 734  $\mu$ mol, 1.00 eq.) was co-evaporated with pyridine (2 mL) and re-dissolved in anhydrous pyridine (2.5 mL) under nitrogen atmosphere. *N,N*-dimethylformamide dimethyl acetal (DMF-DMA, 175 mg, 196  $\mu$ L, 1.47 mmol, 2.00 eq.) was added. The resulting mixture was stirred for 18 h at room temperature and then evaporated to dryness. The residue was re-dissolved in dry pyridine (2.5 mL) and 4,4'-dimethoxytrityl chloride (298 mg, 881  $\mu$ mol, 1.20 eq.) was added in one portion. After stirring for 2 h at room temperature, the reaction mixture was quenched with methanol (3 mL). The reaction mixture was evaporated to dryness and then co-evaporated with toluene (3 mL). The residue was diluted with dichloromethane (30 mL) and then washed with aqueous citric acid (5%), water and saturated aqueous NaHCO<sub>3</sub>. The organic layer was dried with Na<sub>2</sub>SO<sub>4</sub> and concentrated under reduced pressure. The crude product was purified by column chromatography (DCM/MeOH, 80:1 with 2% v/v NEt<sub>3</sub>) to give the title compound as a colorless foam (433 mg, 653  $\mu$ mol, 89%).

<sup>1</sup>H NMR (CDCl<sub>3</sub>, 400 MHz):  $\delta$  (ppm) = 3.38 (dd, J = 11.0, 3.0 Hz; 1H, H<sup>1-5'</sup>), 3.47 (dd, J = 11.0, 3.0 Hz; 1H, H<sup>2-5'</sup>), 3.56 (s, 3H, N-CH<sub>3</sub>), 3.77 (d, J = 2.2 Hz; 6H, OCH<sub>3</sub>), 4.23 (dt, J = 5.0, 3.0 Hz; 1H, H-4'), 4.28 (dd, J = 5.0, 3.6 Hz; 1H, H-2'), 4.35 (t, J = 5.0 Hz; 1H, H-3'), 5.85 (d, J = 3.6 Hz; 1H, H-1'), 6.21 (d, J = 8.2 Hz; H-5), 6.78–6.83 (m, 4H, trityl), 7.16–7.21 (m, 1H, trityl), 7.21–7.28 (m, 6H, trityl), 7.32–7.35 (m, 2H, trityl), 7.41–7.46 (m, 2H, bz), 7.50–7.55 (m, 1H, bz), 7.66 (d, J = 8.2 Hz; H-6), 8.11–8.14 (m, 2H, bz).

<sup>13</sup>C NMR (CDCl<sub>3</sub>, 100 MHz):  $\delta$  (ppm) = 30.17 (N-CH<sub>3</sub>), 55.37 (OCH<sub>3</sub>), 62.48 (C5'), 70.86 (C3'), 76.41 (C2'), 84.73 (C4'), 87.14 (C<sub>q</sub>-trityl), 91.85 (C1'), 98.24 (C5), 113.40, 113.51, 113.53 (trityl), 127.24 (trityl), 128.11 (trityl), 128.22 (trityl), 128.32 (bz), 129.83 (bz), 130.12, 130.16 (trityl), 132.55 (bz), 135.30 (C<sub>q</sub>-trityl), 135.74 (C6), 136.02 (C<sub>q</sub>-bz), 144.18 (C<sub>q</sub>-trityl), 151.27 (C2), 155.86 (C4), 158.77 (C<sub>q</sub>-OCH<sub>3</sub>, trityl), 177.43 (C=O, bz).

HR-MS (ESI<sup>+</sup>): Exact mass calculated for C<sub>38</sub>H<sub>37</sub>N<sub>3</sub>NaO<sub>8</sub> [M+Na]<sup>+</sup>: 686.2473, found: 686.2467.

## SUPPORTING INFORMATION

*N*<sup>4</sup>-Benzoyl-5'-*O*-(4,4'-dimethoxytrityl)-*N*<sup>3</sup>-methyl-2'-*O*-{[(triisopropylsilyl)oxy]methyl}cytidine (4)

To a solution of compound **3** (345 mg, 520  $\mu$ mol, 1.00 eq.) in anhydrous 1,2-dichloroethane (4 mL), *N,N*-diisopropylethylamine (311  $\mu$ L, 1.82 mmol, 3.50 eq.) and di-*tert*-butyltin dichloride (174 mg, 572  $\mu$ mol, 1.1 eq.) were added. After stirring at room temperature for 1 h, the reaction mixture was heated to 80 °C, and TOM-Cl (150 mg, 676  $\mu$ mol, 1.30 eq.) was added. After 20 min, the reaction mixture was cooled down to room temperature and diluted with dichloromethane (40 mL). The organic layer was separated, washed with saturated aqueous NaHCO<sub>3</sub> (3 x 20 mL) and dried over Na<sub>2</sub>SO<sub>4</sub>. The crude compound was purified by column chromatography (hexane/EtOAc, 5:1 with 2% v/v NEt<sub>3</sub>), to give the title compound as a colorless foam (207 mg, 243  $\mu$ mol, 47%).

<sup>1</sup>H NMR (CDCl<sub>3</sub>, 400 MHz):  $\delta$  (ppm) = 1.05-1.13 (m, 21H, Si(CH(CH<sub>3</sub>)<sub>2</sub>)<sub>3</sub>), 3.20 (d, J = 6.4 Hz; 1H, C3'-OH), 3.48-3.50 (m; 2H, H-5'), 3.54 (s, 3H, N-CH<sub>3</sub>), 3.78 (d, J = 1.0 Hz; 6H, OCH<sub>3</sub>), 4.09 (dt, J = 6.6, 2.5 Hz; 1H, H-4'), 4.21 (dd, J = 5.0, 2.9 Hz; 1H, H-2'), 4.39-4.48 (m, 1H, H-3'), 5.06 (d, J = 4.7 Hz; 1H, OCH<sub>2</sub>O), 5.25 (d, J = 4.7 Hz; 1H, OCH<sub>2</sub>O), 6.04 (d, J = 2.9 Hz; 1H, H-1'), 6.06 (d, J = 8.2 Hz; H-5), 6.80-6.84 (m, 4H, trityl), 7.17-7.22 (m, 1H, trityl), 7.23-7.29 (m, 6H, trityl, bz), 7.34-7.38 (trityl), 7.41-7.46 (bz), 7.50-7.55 (m, 1H, bz), 7.79 (d, J = 8.2 Hz; H-6), 8.11-8.14 (m, 1H, bz).

<sup>13</sup>C NMR (CDCl<sub>3</sub>, 100 MHz):  $\delta$  (ppm) = 11.99, 17.94 (Si(CH(CH<sub>3</sub>)<sub>2</sub>)<sub>3</sub>), 30.02 (N-CH<sub>3</sub>), 55.36 (OCH<sub>3</sub>), 61.98 (C5'), 69.10 (C3'), 83.27 (C2'), 83.66 (C4'), 87.15 (C<sub>q</sub>-OCH<sub>2</sub>), 88.72 (C1'), 90.80 (OCH<sub>2</sub>O), 98.29 (C5), 113.40 (trityl), 127.24 (trityl), 128.13 (trityl), 128.30, 128.35 (trityl, bz), 129.82 (bz), 130.15, 130.24 (trityl), 132.50 (bz), 135.34, 135.64 (trityl, C<sub>q</sub>), 135.88 (C6), 136.07 (bz, C<sub>q</sub>), 144.18 (trityl, C<sub>q</sub>), 150.40 (NC(=O)N), 155.83 (C=N), 158.77 (trityl, C<sub>q</sub>-OCH<sub>3</sub>), 177.44 (C=O, bz).

HR-MS (ESI<sup>+</sup>): Exact mass calculated for C<sub>48</sub>H<sub>59</sub>N<sub>3</sub>NaO<sub>9</sub>Si [M+Na]<sup>+</sup>: 872.3913, found: 872.3895.

*N*<sup>4</sup>-Benzoyl-5'-*O*-(4,4'-dimethoxytrityl)-*N*<sup>3</sup>-methyl-2'-*O*-{[(triisopropylsilyl)oxy]methyl}cytidine 3'-*O*-(2-cyanoethyl diisopropylphosphoramidite) (5)

To a solution of compound **4** (188 mg, 221  $\mu$ mol, 1.00 eq.) in anhydrous dichloromethane (4 mL), *N,N*-dimethylethylamine (240  $\mu$ L, 2.21 mmol, 10.0 eq.) and 2-cyanoethyl *N,N*-diisopropylchlorophosphoramidite (78.6 mg, 332  $\mu$ mol, 1.50 eq.) were added, and the reaction mixture was stirred for 2.5 h at room temperature. Afterwards, the reaction mixture was evaporated to dryness under reduced pressure. The crude product was purified by column chromatography (hexane/EtOAc, 3:1 with 2% v/v NEt<sub>3</sub>) to yield the title compound as a colorless foam (211 mg, 201  $\mu$ mol, 91%).

<sup>1</sup>H NMR (CDCl<sub>3</sub>, 400 MHz):  $\delta$  (ppm) = 0.99-1.08 (m, 42H, CH<sub>3</sub> (isopropyl-N); Si(CH(CH<sub>3</sub>)<sub>2</sub>)<sub>3</sub>, diast.), 1.14-1.19 (m, 18H, CH<sub>3</sub> (isopropyl-N), diast.) 2.37 (td, 2H, J = 6.5, 2.0 Hz; POCH<sub>2</sub>CH<sub>2</sub>, diast.), 2.64 (td, 2H, J = 6.1, 4.0 Hz; POCH<sub>2</sub>CH<sub>2</sub>, diast.), 3.38 (td, 2H, J = 10.6, 2.90 Hz; H-5', diast.), 3.53 (s, 3H, diast., N-CH<sub>3</sub>), 3.53 (s, 3H, N-CH<sub>3</sub>), 3.53-3.60 (m, 4H, diast., H-5', N(CH(CH<sub>3</sub>)<sub>2</sub>)<sub>2</sub> and H<sup>2</sup>, POCH<sub>2</sub>), 3.61-3.68 (m, 1H, H<sup>2</sup>, POCH<sub>2</sub>), 3.78 (d, 5H, diast., OCH<sub>3</sub>), 3.79 (d, 6H, J = 0.8 Hz; OCH<sub>3</sub>), 3.81-3.88 (m, 1H, H<sup>1</sup>, POCH<sub>2</sub>), 3.94 (ddt, 1H, J = 10.5, 7.5, 6.1 Hz; diast., H<sup>1</sup>, POCH<sub>2</sub>), 4.20 (dt, 1H, J = 4.7, 2.7 Hz; diast., H-4'), 4.27 (dd, 1H, J = 5.3, 2.5 Hz; H-4'), 4.39-4.42 (m, diast. H-3', H-2'), 4.35-4.38 (m, 1H, H-2'), 4.45 (dt, 1H, J = 10.3, 5.4 Hz; H-3'), 5.03 (d, 1H, J = 4.8 Hz; H<sup>2</sup>, OCH<sub>2</sub>O), 5.05 (d, 1H, diast. H<sup>2</sup>, OCH<sub>2</sub>O), 5.09 (d, 2H, J = 4.8 Hz, H<sup>1</sup>, OCH<sub>2</sub>O, diast.), 6.08 (d, 1H, diast., H-5), 6.13 (d, 1H, J = 8.2 Hz, H-5), 6.16 (d, 1H, J = 4.2 Hz; H-1'), 6.18 (d, 1H, diast., H-1'), 6.79-6.85 (m, 8H, trityl, diast.), 7.17-7.23 (m, 2H, trityl, diast.), 7.24-7.30 (m, 7H, trityl), 7.33-7.40 (m, 4H, trityl, diast.), 7.41-7.46 (m, 4H, bz, diast.), 7.50-7.55 (m, 2H, bz, diast.), 7.66 (d, 1H, diast., J = 8.2 Hz; H-6), 7.74 (d, 1H, J = 8.2 Hz; H-6), 8.11-8.15 (m, 4H, bz, diast.).

<sup>13</sup>C NMR (CDCl<sub>3</sub>, 100 MHz):  $\delta$  (ppm) = 12.1, 18.0 (Si(CH(CH<sub>3</sub>)<sub>2</sub>)<sub>3</sub>), 20.3, 20.5 (POCH<sub>2</sub>CH<sub>2</sub>), 24.7, 24.8 (CH<sub>3</sub>, isopropyl-N), 30.1 (N-CH<sub>3</sub>), 43.2, 43.4 (N(CH(CH<sub>3</sub>)<sub>2</sub>)<sub>2</sub>), 55.4 (OCH<sub>3</sub>), 57.4, 58.1, 58.9, 59.1 (POCH<sub>2</sub>), 61.9 (C5'), 70.2, 70.7 (C3'), 77.9, 78.5 (C2'), 83.2, 83.3 (C4'), 87.1, 87.3 (trityl, C<sub>q</sub>OCH<sub>2</sub>), 88.1, 88.3 (C1'), 89.2, 89.5 (OCH<sub>2</sub>O), 113.4 (trityl), 117.5, 117.8 (CN), 127.3 (trityl), 128.1, 128.3, 128.4 (bz, trityl), 128.5 (trityl), 129.8 (bz), 130.2, 130.3 (trityl), 132.4 (bz), 135.3, 135.4, 135.6 (trityl), 136.1, 136.2 (bz, C<sub>q</sub>), 144.1, 144.2 (trityl), 150.4 (C2), 155.8, 155.9 (C4), 158.8 (C<sub>q</sub>-OCH<sub>3</sub>), 177.4 (C=O, bz).

<sup>31</sup>P-NMR (CDCl<sub>3</sub>, 162 MHz): 150.12, 150.50.

HR-MS (ESI<sup>+</sup>): Exact mass calculated for C<sub>57</sub>H<sub>76</sub>N<sub>5</sub>NaO<sub>10</sub>PSi [M+Na]<sup>+</sup>: 1072.4991, found: 1072.4968.

**Solid-phase synthesis of oligoribonucleotides**

RNA oligonucleotide syntheses were carried out at 0.7–1  $\mu$ mol scale on ABI 394 DNA/RNA synthesizer using standard  $\beta$ -cyanoethyl phosphoramidite chemistry with the building blocks mentioned above. Deprotection of m<sup>3</sup>C-modified oligoribonucleotides was performed with a mixture of concentrated aqueous NH<sub>3</sub> and EtOH (3:1) at 55 °C for 6 h followed by incubation with 1 M TBAF in THF under standard conditions. Conversion of the O<sup>4</sup>-chlorophenyluridine-modified oligoribonucleotide into the m<sup>4,4</sup>C-modified RNA (Table S1, R27) was performed by incubation of the solid support with 0.7 ml of 40% aqueous Me<sub>2</sub>NH at 37 °C for 5 h followed by addition of 0.5 ml of aqueous NH<sub>3</sub> and further incubation at 55 °C for 2 h to ensure complete deprotection of cyanoethyl and acetyl groups. Deprotection of TOM groups was achieved with TBAF in THF under standard conditions. Deprotection of other oligonucleotides was performed under standard conditions with MeNH<sub>2</sub> in aqueous ethanol and TBAF in THF. The crude oligonucleotides were desalted by size exclusion chromatography on GE Healthcare Life Sciences ÄKTA™ start system (3x5 ml HiTrap columns), purified by PAGE, and analyzed by anion exchange HPLC and HR-ESI-MS.

## SUPPORTING INFORMATION

### Labeling of oligonucleotides

#### Labeling of 5'-alkyne functionalized oligonucleotides

Oligonucleotides with 5'-alkynes were labeled with 6-FAM-azide using copper(I)-catalyzed alkyne-azide cycloaddition (CuAAC). Oligonucleotide (5 nmol in 5  $\mu$ l of H<sub>2</sub>O) was mixed with 3  $\mu$ l of DMSO/tBuOH (3:1 v/v) and 0.5  $\mu$ l of 6-FAM-azide (50 mM in DMSO/tBuOH 3:1). The solution of CuBr (100 mM) was freshly prepared in DMSO/tBuOH 3:1 and mixed with a solution of TBTA (100 mM) in 1:2 ratio. From this solution, 1.5  $\mu$ l was added to the reaction mixture and incubated at 37 °C for 3 hours in the dark. Afterwards, the reaction mixture was precipitated with ethanol to remove excess fluorophore, and the labeled oligonucleotide was purified using PAGE.

#### Labeling of RNA at 3'-end

Unfunctionalized oligoribonucleotides were labeled by periodate oxidation followed by a reaction with fluorescein-5-thiosemicarbazide. In a typical procedure, RNA (0.3–1 nmol) was dissolved in 7.5  $\mu$ l water, followed by addition of 5x sodium phosphate buffer (2  $\mu$ l, 250 mM, pH 7.4) and a freshly prepared aqueous solution of NaIO<sub>4</sub> (0.5  $\mu$ l, 400 mM). The resulting mixture was incubated for 10–15 min at 37 °C. The excess of NaIO<sub>4</sub> was quenched by treatment with aqueous Na<sub>2</sub>SO<sub>3</sub> (1  $\mu$ l, 1 M) for 5–10 min at 37 °C. Afterwards, a solution of fluorescein-5-thiosemicarbazide (1  $\mu$ l, 10 mM) in DMF was added, and the reaction mixture was incubated in the dark for additional 1 h at 37 °C. The labeled product was then purified by PAGE (10–20% polyacrylamide) and recovered by extraction and ethanol precipitation.

#### Radioactive labeling of RNA at 5'-end

Radioactive labeling of RNA was performed by phosphorylation using  $\gamma$ -<sup>32</sup>P-ATP. In a typical procedure, RNA (200–500 pmol) was incubated with 10x PNK buffer A (5  $\mu$ l, 500 mM Tris-HCl, 10 mM MgCl<sub>2</sub>, 50 mM DTT, 1 mM spermidine),  $\gamma$ -<sup>32</sup>P-ATP (0.5  $\mu$ l, 10  $\mu$ Ci/ $\mu$ l) and T4 PNK enzyme (0.5  $\mu$ l, 10 U/ $\mu$ l) at 37 °C for 1 hours. The labeled RNA was recovered by ethanol precipitation.

#### Ribozyme-catalyzed fluorescent labeling of RNA

Oligoribonucleotides R12, R16 and R20 were labeled at 2'-OH of internal adenosine (A9) with N<sup>6</sup>-(6-aminoheptyl)-ATP-6-FAM, N<sup>6</sup>-(6-aminoheptyl)-ATP-Cy3, N<sup>6</sup>-(6-aminoheptyl)-ATP-ATTO-647N, respectively, according to the known procedure.<sup>[6]</sup> In a typical procedure, RNA (500 pmol) and ribozyme FH14 (700 pmol) were incubated in total volume of 20  $\mu$ l of the reaction buffer (5 mM NaCl, 120 mM KCl, 50 mM HEPES, pH 7.5) including 40 mM MgCl<sub>2</sub> and 200  $\mu$ M of the N<sup>6</sup>-modified ATP. The annealing step (95 °C for 3 min, then r.t. for 10 min) was performed prior to addition of MgCl<sub>2</sub> and ATP. The reaction mixture was incubated overnight at 37 °C and then quenched with 20  $\mu$ l of stop solution. The labeled RNA was purified by PAGE (20%).

### ***In-vitro* selection**

#### Phosphorylation of RNA substrates for selection

Phosphorylation at 5'-end of RNA substrates was carried out with T4 PNK as follows: RNA (2–5 nmol) was incubated with 10x PNK buffer A (5  $\mu$ l, 500 mM Tris-HCl, 10 mM MgCl<sub>2</sub>, 50 mM DTT, 1 mM spermidine), ATP (5  $\mu$ l, 10 mM) and T4 PNK (5  $\mu$ l, 10 U/ $\mu$ l) at 37 °C for 5 hours. Total volume of the reaction mixture was 50  $\mu$ l. The phosphorylated RNA was extracted with phenol/chloroform/isoamylalcohol mixture and ethanol precipitated.

#### Splinted ligation of RNA substrate and deoxyribozyme library

Splinted ligation was carried out with T4 DNA ligase as described earlier.<sup>[7]</sup> In a typical procedure, the deoxyribozyme pool, 5'-phosphorylated RNA and complementary DNA splint (1.8 nmol, 2.4 nmol and 2 nmol, respectively) were dissolved in water (9  $\mu$ l), and 10x annealing buffer (1  $\mu$ l; 40 mM Tris-HCl, 150 mM NaCl, 1 mM EDTA, pH 8.0) was added. After 2 min incubation at 95 °C, the solution was allowed to cool down to r.t. for 15 min and then further cooled down to 0 °C for 10 min. 10x DNA Ligase buffer (2  $\mu$ l; 400 mM Tris-HCl, 100 mM MgCl<sub>2</sub>, 100 mM DTT, 5 mM ATP, pH 7.8), T4 DNA Ligase (2  $\mu$ l; 5 U/ $\mu$ l) and water to a total volume of 20  $\mu$ l were added, and the resulting mixture incubated for 2 h at 37 °C to yield a DNA-RNA hybrid product which was purified by PAGE.



## SUPPORTING INFORMATION

### Intramolecular cleavage of RNA-DNA hybrids (key selection step)

The DNA-RNA hybrid (250 pmol in first round and 10–30 pmol in further rounds) was incubated with 10x selection buffer (1  $\mu$ l, 500 mM Tris-HCl, 1.5 M NaCl, pH 7.5) in a total volume of 9  $\mu$ l. To initiate the reaction, MgCl<sub>2</sub> (1  $\mu$ l, 100 mM) was added to the final concentration of 10 mM and reaction mixture was incubated at 37 °C for 16 hours. Active fraction of DNA enzymes was separated using denaturing PAGE (10%) and the gel areas corresponding to the cleaved products (determined by comparison with a size marker) were cut and extracted. Extracted products were ethanol precipitated and amplified with PCR.

### PCR amplification of the enriched DNA library

The enriched DNA library was amplified via two subsequent asymmetric PCR reactions.<sup>[7]</sup> In the first PCR, the extracted product from previous step was used as a template. Template (30  $\mu$ l), forward primer D2 (200 pmol), reverse primer D3 (50 pmol), dNTP mixture (0.625  $\mu$ l, 20 mM each dNTP), 10x DreamTaq buffer (5  $\mu$ l) and DreamTaq DNA polymerase (0.25  $\mu$ l, 5 U/ $\mu$ l) were mixed, and the total volume was adjusted to 50  $\mu$ l with water. The resulting mixture was subjected to a 10-cycle PCR reaction (95 °C for 4 minutes, 10x [95 °C for 30 s, 60 °C for 30 s, 72 °C for 1 min] and 72 °C for 5 minutes) using a Bio-Rad thermal cycler. For the second PCR reaction, an aliquot (1–2  $\mu$ l) from PCR-I was used as template. This aliquot was mixed with fluorescently labeled forward primer D2.1 (200 pmol), reverse primer D3 (50 pmol), dNTP mixture (0.6  $\mu$ l, 20 mM), 10x DreamTaq buffer (5  $\mu$ l), DreamTaq DNA polymerase (0.5  $\mu$ l, 5 U/ $\mu$ l) and water to a final volume of 50  $\mu$ l. The resulting solution was subjected to a 30-cycle PCR reaction (95 °C for 4 minutes, 30x [95 °C for 30 s, 60 °C for 30 s, 72 °C for 1 min], and 72 °C for 5 min). The PCR product was subjected to denaturing PAGE and the short strand with the fluorescent label was isolated. The resulting ssDNA was used for ligation to RNA substrate to initiate the next round of selection.

## Cloning and sequencing

After 18 rounds of selection, the enriched libraries AK, AL, AM and AN were cloned using TOPO-TA cloning and transformed into *E. Coli*. The plasmids of 40 randomly picked colonies were isolated and sequenced using Sanger sequencing. Enriched libraries from rounds 7 and 18 were also subjected to deep sequencing. For this purpose, total eight selection libraries were amplified in a 2-step PCR protocol, in which Illumina adaptors and unique indices were introduced. The PCR products were purified on PAGE (10%) and with ZYMO Oligo Clean & Concentrator kit. After quality control on a Bioanalyzer, the libraries were pooled, and sequenced as a fraction of a NextSeq 500 High Output 75 nt single-end run in the Core Unit Systems Medicine (University of Würzburg). After demultiplexing, the resulting fastq files were further processed using custom bash, R and Python scripts.

## Kinetics characterization of deoxyribozyme-catalyzed RNA cleavage

Kinetics characterization was carried out as described previously<sup>[8]</sup> to analyze trans-activity of individual deoxyribozymes or active deoxyribozyme pools under single turnover conditions. In a typical procedure, a deoxyribozyme (100 pmol) was mixed with a fluorescently labeled RNA substrate (10 pmol) in a final volume of 8  $\mu$ l. The resulting mixture was heated to 95 °C for 4 min and then cooled to 25 °C for 10 min. To initiate the reaction, 10x kinetic assay buffer (1  $\mu$ l, 500 mM Tris-HCl, 1.5 M NaCl), pH 7.5) and MgCl<sub>2</sub> (1  $\mu$ l, 200 mM) were added and the resulting mixture was incubated at 37 °C. Aliquots (1  $\mu$ l) were taken at different time points (e.g. 0, 15 min, 30 min, 60 min, 180 min, and 360 min), quenched with loading buffer and analyzed by denaturing PAGE. Cleavage yields were determined by measuring fluorescent intensities of the corresponding bands. Values of  $k_{obs}$  (observed cleavage rate) and  $Y_{max}$  (maximum fraction cleaved) were obtained by fitting fraction cleaved versus time with the first-order kinetics equation  $Y = Y_{max} * (1 - e^{-k_{obs}t})$ . Each experiment was repeated at least trice, and values are reported as mean of three individual experiments.

## Synthesis and analysis of mt-tRNAs

Unmodified mt-tRNA<sup>Glu</sup> was prepared by *in vitro* transcription from a synthetic DNA template using T7 RNA polymerase. Reactions were performed in aqueous solution containing 40 mM Tris-HCl, pH 8.0, 10mM DTT, 4 mM each NTP, 30 mM MgCl<sub>2</sub> and 2 mM spermidine and 20  $\mu$ g of T7 RNA polymerase (prepared in house) at 37 °C for 5 h. The transcription products were purified by denaturing PAGE (10% polyacrylamide) and dephosphorylated by calf intestinal alkaline phosphatase. The m<sup>3</sup>C-modified mt-tRNA<sup>Glu</sup> was assembled by splint ligation of two RNA fragments (R25 and R26). The m<sup>3</sup>C-modified mt-tRNA<sup>Thr</sup> and unmodified mt-tRNA<sup>Thr</sup> were constructed by splint ligation of three synthetic RNA fragments (R21, R22, R23) and (R21, R22, R24) respectively. In a typical procedure, RNA fragments and complementary splint (D52/D53) in equimolar ratio were annealed in 10x annealing buffer (40 mM Tris-HCl, 150 mM NaCl, 1 mM EDTA, pH 8.0) and ligation reactions were then performed with T4 DNA ligase for 16 h at 37 °C. Full length products were separated by PAGE (10% polyacrylamide), and labeled with  $\gamma$ -<sup>32</sup>P-ATP at their 5'end. Aliquots of the full-length tRNA samples were then subjected to DNAzyme-mediated cleavage using the corresponding DNAzymes (D54/D55/D57/D58) as described above.

## SUPPORTING INFORMATION

---

To disrupt the secondary structure of tRNAs close to DNAzyme binding site, disruptor oligonucleotides (D56/D59) were added in the cleavage reactions. Labeled tRNAs (approx. 10 pmol) were annealed with corresponding DNAzyme (100 pmol) and disruptor oligonucleotides (100 pmol). The reactions were incubated in a final volume of 10  $\mu$ l of 1x selection buffer (50 mM Tris-HCl, 150 mM NaCl, pH 7.5) including 40 mM  $MgCl_2$  at 37°C for 18 h. Aliquots (2  $\mu$ l) were taken at 0, 6 h and 18 h, quenched with loading buffer and analyzed by denaturing PAGE. The gels were dried under vacuum for 30 min at 80 °C, exposed overnight to a phosphor storage screen and imaged on a Typhoon phosphorimager.



## SUPPORTING INFORMATION

## Supporting Tables

Table S1. Sequences of RNA oligonucleotides

| No  | Description/motif                                   | 5'-sequence-3'                                                                                                                                  | mol. wt. calc., amu | mol. wt. found. m/z |
|-----|-----------------------------------------------------|-------------------------------------------------------------------------------------------------------------------------------------------------|---------------------|---------------------|
| R1  | unmodified/NC                                       | AUAGACUGAAUGAA <sup>NC</sup> GUAACUAGUC                                                                                                         | -                   | -                   |
| R2  | Nm <sup>3</sup> C                                   | AUAGACUGAAUGAA <sup>Nm<sup>3</sup></sup> CGUAACUAGUC                                                                                            | -                   | -                   |
| R3  | Nm <sup>4</sup> C                                   | AUAGACUGAAUGAA <sup>Nm<sup>4</sup></sup> CGUAACUAGUC                                                                                            | -                   | -                   |
| R4  | Nm <sup>5</sup> C                                   | AUAGACUGAAUGAA <sup>Nm<sup>5</sup></sup> CGUAACUAGUC                                                                                            | -                   | -                   |
| R5  | unmodified/AC                                       | AUAGACUGAAUGAA <sup>AC</sup> GUAACUAGUC                                                                                                         | 8339.17             | 8339.34             |
| R6  | unmodified/GC                                       | AUAGACUGAAUGAA <sup>GC</sup> GUAACUAGUC                                                                                                         | 8355.17             | 8355.25             |
| R7  | unmodified/CC                                       | AUAGACUGAAUGAA <sup>CC</sup> GUAACUAGUC                                                                                                         | 8315.16             | 8315.19             |
| R8  | unmodified/UC                                       | AUAGACUGAAUGAA <sup>UC</sup> GUAACUAGUC                                                                                                         | 8316.14             | 8316.21             |
| R9  | Am <sup>3</sup> C                                   | AUAGACUGAAUGAA <sup>Am<sup>3</sup></sup> CGUAACUAGUC                                                                                            | 8353.19             | 8353.00             |
| R10 | Gm <sup>3</sup> C                                   | AUAGACUGAAUGAA <sup>Gm<sup>3</sup></sup> CGUAACUAGUC                                                                                            | 8369.18             | 8369.27             |
| R11 | Cm <sup>3</sup> C                                   | AUAGACUGAAUGAA <sup>Cm<sup>3</sup></sup> CGUAACUAGUC                                                                                            | 8329.18             | 8329.31             |
| R12 | Um <sup>3</sup> C                                   | AUAGACUGAAUGAA <sup>Um<sup>3</sup></sup> CGUAACUAGUC                                                                                            | 8330.16             | 8330.27             |
| R13 | Am <sup>4</sup> C                                   | AUAGACUGAAUGAA <sup>Am<sup>4</sup></sup> CGUAACUAGUC                                                                                            | 8353.19             | 8253.20             |
| R14 | Gm <sup>4</sup> C                                   | AUAGACUGAAUGAA <sup>Gm<sup>4</sup></sup> CGUAACUAGUC                                                                                            | 8369.18             | 8369.19             |
| R15 | Cm <sup>4</sup> C                                   | AUAGACUGAAUGAA <sup>Cm<sup>4</sup></sup> CGUAACUAGUC                                                                                            | 8329.18             | 8329.20             |
| R16 | Um <sup>4</sup> C                                   | AUAGACUGAAUGAA <sup>Um<sup>4</sup></sup> CGUAACUAGUC                                                                                            | 8330.16             | 8330.18             |
| R17 | Am <sup>5</sup> C                                   | AUAGACUGAAUGAA <sup>Am<sup>5</sup></sup> CGUAACUAGUC                                                                                            | 8353.19             | 8353.25             |
| R18 | Gm <sup>5</sup> C                                   | AUAGACUGAAUGAA <sup>Gm<sup>5</sup></sup> CGUAACUAGUC                                                                                            | 8369.18             | 8369.24             |
| R19 | Cm <sup>5</sup> C                                   | AUAGACUGAAUGAA <sup>Cm<sup>5</sup></sup> CGUAACUAGUC                                                                                            | 8329.18             | 8329.25             |
| R20 | Um <sup>5</sup> C                                   | AUAGACUGAAUGAA <sup>Um<sup>5</sup></sup> CGUAACUAGUC                                                                                            | 8330.16             | 8330.20             |
| R21 | mt-tRNA <sup>Thr</sup> 5' fragment                  | GUCCUUGUAGUAUAAACUAAUACA                                                                                                                        |                     |                     |
| R22 | mt-tRNA <sup>Thr</sup> 3' fragment                  | pGAUGAAAACCUUUUCCAAGGACAp                                                                                                                       |                     |                     |
| R23 | mt-tRNA <sup>Thr</sup> m <sup>3</sup> C ASL         | CCAGUm <sup>3</sup> CUUGUAAACCGGA                                                                                                               |                     |                     |
| R24 | mt-tRNA <sup>Thr</sup> unmod. ASL                   | CCAGUCUUGUAAACCGGA                                                                                                                              |                     |                     |
| R25 | mt-tRNA <sup>Glu</sup> 5'-fragment                  | GUUCUUGUAGUUGAAAUAACAACGAUGGUUUUUCUAUA                                                                                                          |                     |                     |
| R26 | mt-tRNA <sup>Glu</sup> m <sup>5</sup> C 3'-fragment | UCAUUGGUm <sup>5</sup> CUGGUUGUAGUCCGUGCGAGAAUA                                                                                                 |                     |                     |
| R27 | Um <sup>4,4</sup> C                                 | AUAGACUGAAUGAA <sup>Um<sup>4,4</sup></sup> C <sup>4</sup> GUAACUAGUC                                                                            | 8344.14             | 8344.24             |
| R28 | unmodified/UC transcript                            | GGAUAGACUGAAUGAA <sup>UC</sup> GUAACUAGUCA <sup>[a]</sup>                                                                                       | 9575.14             | 9575.18             |
| R29 | unmodified/UU transcript                            | GGAUAGACUGAAUGAA <sup>UU</sup> GUAACUAGUCA <sup>[a]</sup>                                                                                       | 9905.14             | 9905.28             |
| R30 | unmodified/UA transcript                            | GGAUAGACUGAAUGAA <sup>UA</sup> GUAACUAGUCA <sup>[a]</sup>                                                                                       | 9928.15             | 9928.30             |
| R31 | unmodified/UA transcript                            | GGAUAGACUGAAUGAA <sup>UG</sup> GUAACUAGUCA <sup>[a]</sup>                                                                                       | 9944.14             | 9944.30             |
| R32 | Um <sup>5</sup> C transcript                        | GGAUAGAm <sup>5</sup> CUGAAUGAA <sup>Um<sup>5</sup></sup> C <sup>5</sup> GUA <sup>Am<sup>5</sup></sup> CUAGUm <sup>5</sup> CA <sup>[a]</sup>    | 9630.19             | 9630.31             |
| R33 | Uhm <sup>5</sup> C transcript                       | GGAUAGAhm <sup>5</sup> CUGAAUGAA <sup>Uhm<sup>5</sup></sup> C <sup>5</sup> GUA <sup>hm<sup>5</sup></sup> CUAGUhm <sup>5</sup> CA <sup>[a]</sup> | 9694.17             | 9694.27             |
| R34 | Uf <sup>5</sup> C transcript                        | GGAUAGAf <sup>5</sup> CUGAAUGAA <sup>Uf<sup>5</sup></sup> C <sup>5</sup> GUA <sup>f<sup>5</sup></sup> CUAGUf <sup>5</sup> CA <sup>[a]</sup>     | 9686.11             | 9686.19             |

<sup>[a]</sup> non-templated A added by T7 RNA polymerase in vitro transcription

Table S2. Sequences of DNA oligonucleotides

| No   | Description                                | 5'-Sequence-3' <sup>[a]</sup>                         |
|------|--------------------------------------------|-------------------------------------------------------|
| D1   | Selection pool                             | GTGACGCGACTAGTTACN <sub>20</sub> TTCATTCAGTTGGCGACTCC |
| D2   | Selection forward primer                   | GTGACGCGACTAGTTAC                                     |
| D2.1 | Selection forward primer (for 5'-labeling) | Alk-GTGACGCGACTAGTTAC                                 |
| D3   | Selection reverse primer (tailed)          | (CAA) <sub>4</sub> E <sub>3</sub> GGAGCGCCAACTGAATGAA |
| D4   | Splint for selection pool (round1)         | TTCATTCAGTCTATGGAGTCGCCAACTG                          |
| D5   | Splint for other selection rounds          | TTACGTTTCATTCAGTCTAT <sup>T</sup> GGAGTCGCCAACT       |
| D6   | AK02                                       | GACTAGTTAC CAAGGAGCACGGAAC <sup>TTC</sup> TTCATTCAGT  |
| D7   | AK03                                       | GACTAGTTAC GGCAGGAGCAGTCACATCG TTCATTCAGT             |
| D8   | AK04                                       | GACTAGTTAC CCAACCAGGCCGGCACATA TTCATTCAGT             |
| D9   | AK11                                       | GACTAGTTAC CAACCAGGATGCGGAACCA TTCATTCAGT             |
| D10  | AK12                                       | GACTAGTTAC GGGGTATACAGTGGGGCGA TTCATTCAGT             |

## SUPPORTING INFORMATION

|     |                                      |                                             |                      |            |
|-----|--------------------------------------|---------------------------------------------|----------------------|------------|
| D11 | AK13                                 | GACTAGTTAC                                  | GGGTATACAGTGGCGCGAA  | TTCATTCAGT |
| D12 | AK24                                 | GACTAGTTAC                                  | CCAACGGTTGAGTCACCCC  | TTCATTCAGT |
| D13 | AL01                                 | GACTAGTTAC                                  | CGCAGGTGTTTGTGGGGTAA | TTCATTCAGT |
| D14 | AL03                                 | GACTAGTTAC                                  | GGTTCGGGACGGCCTGGTAA | TTCATTCAGT |
| D15 | AL04                                 | GACTAGTTAC                                  | GGGTAGCCAGTGGACGTT   | TTCATTCAGT |
| D16 | AL07                                 | GACTAGTTAC                                  | GGGCAGGTGGTGGGAAGGG  | TTCATTCAGT |
| D17 | AL10                                 | GACTAGTTAC                                  | CGAGGCGCGAACCACCCAC  | TTCATTCAGT |
| D18 | AL12                                 | GACTAGTTAC                                  | CGTTACGGAGTGCCTGGTAA | TTCATTCAGT |
| D19 | AL13                                 | GACTAGTTAC                                  | GGGGTAAGACTGGGGTAG   | TTCATTCAGT |
| D20 | AL15                                 | GACTAGTTAC                                  | GGTTACGTAGTGCCTGGTTG | TTCATTCAGT |
| D21 | AL18                                 | GACTAGTTAC                                  | CCGATCGTGGACTCCGGAGA | TTCATTCAGT |
| D22 | AL21                                 | GACTAGTTAC                                  | GGCACCAACTGGAGTCTGGG | TTCATTCAGT |
| D23 | AM05                                 | GACTAGTTAC                                  | GGGGTACCGGTGGAGACTA  | TTCATTCAGT |
| D24 | AM06                                 | GACTAGTTAC                                  | CCAACAAGGAGGGTCACCC  | TTCATTCAGT |
| D25 | AM11                                 | GACTAGTTAC                                  | CAAACGATCGCCGGCACCG  | TTCATTCAGT |
| D26 | AM12                                 | GACTAGTTAC                                  | CACCACAATCGCGGAACCG  | TTCATTCAGT |
| D27 | AM13                                 | GACTAGTTAC                                  | GGGAGCGACACAACCATCA  | TTCATTCAGT |
| D28 | AM17                                 | GACTAGTTAC                                  | CACGTGGTGAGCACTCTAAC | TTCATTCAGT |
| D29 | AM18                                 | GACTAGTTAC                                  | CACGTGGTGAGCACTTCTAC | TTCATTCAGT |
| D30 | AM20                                 | GACTAGTTAC                                  | GGCACCCTGGAGTCTGGT   | TTCATTCAGT |
| D31 | AM21                                 | GACTAGTTAC                                  | CGCTGGGTGGGTGCGCGG   | TTCATTCAGT |
| D32 | AN01                                 | GACTAGTTAC                                  | CCAACAGACAGCGGCACCTC | TTCATTCAGT |
| D33 | AN02                                 | GACTAGTTAC                                  | GGGGCGGAACGTAATCTTA  | TTCATTCAGT |
| D34 | AN03                                 | GACTAGTTAC                                  | CCACAGGCACGAGGATGTAA | TTCATTCAGT |
| D35 | AN04                                 | GACTAGTTAC                                  | GGGTATACAGTGGCGCGA   | TTCATTCAGT |
| D36 | AN05                                 | GACTAGTTAC                                  | GGTAGTAGGATGGCGATCCG | TTCATTCAGT |
| D37 | AN07                                 | GACTAGTTAC                                  | GGACACAGCTGGTACCGGT  | TTCATTCAGT |
| D38 | AN12                                 | GACTAGTTAC                                  | CACCAACTAGGAGCACCCG  | TTCATTCAGT |
| D39 | AN14                                 | GACTAGTTAC                                  | CCCATACTAGCGTCGTCCG  | TTCATTCAGT |
| D40 | AN19                                 | GACTAGTTAC                                  | CGGCTGGACGTTGACGCGGT | TTCATTCAGT |
| D41 | AN24                                 | GACTAGTTAC                                  | CCAGTAACGTGTCCGCCAT  | TTCATTCAGT |
| D42 | AK104                                | GACTAGTTAC                                  | GGGTGCCGGGTGAGCGTTAT | TTCATTCAGT |
| D43 | AK118                                | GACTAGTTAC                                  | GGGTAGCCAGTGGGACGTG  | TTCATTCAGT |
| D44 | AL107                                | GACTAGTTAC                                  | GGGTAGGTGGTGGGAAGGG  | TTCATTCAGT |
| D45 | AL112                                | GACTAGTTAC                                  | GGTTGCGGTAGCGCCTGGTG | TTCATTCAGT |
| D46 | AM101                                | GACTAGTTAC                                  | CGGGCCGGGGTTAATCG    | TTCATTCAGT |
| D47 | AM102                                | GACTAGTTAC                                  | TCAACAGCCGAAACGACCA  | TTCATTCAGT |
| D48 | AM106                                | GACTAGTTAC                                  | GGGTATACAGTGGTGC GA  | TTCATTCAGT |
| D49 | AM108                                | GACTAGTTAC                                  | CGGCTGGACGTTGACGCGA  | TTCATTCAGT |
| D50 | AN109                                | GACTAGTTAC                                  | TCAACAGCCGAAACGACAC  | TTCATTCAGT |
| D51 | AL112_G20A                           | GACTAGTTAC                                  | GGTTGCGGTAGCGCCTGGTA | TTCATTCAGT |
| D52 | Splint mt-tRNA <sup>Thr</sup>        | AAGGTTTTTCATCTCCGGTTTTACAAGACTGGTGTATTAGTTT |                      |            |
| D53 | Splint mt-tRNA <sup>Glu</sup>        | GACCAATGATATGAAAAACCATCG                    |                      |            |
| D54 | AK104 for mt-tRNA <sup>Thr</sup>     | TCCGGTTTTACAA                               | GGGTGCCGGGTGAGCGTTAT | CTGGTGTATT |
| D55 | AL112 for mt-tRNA <sup>Thr</sup>     | TCCGGTTTTACAA                               | GTTTGGGTAGCGCCTGGTG  | CTGGTGTATT |
| D56 | Disruptor for mt-tRNA <sup>Thr</sup> | TTTATACTACAAGGAC                            |                      |            |
| D57 | AK104 for mt-tRNA <sup>Glu</sup>     | GACTACAACCAC                                | GGGTGCCGGGTGAGCGTTAT | CCAATGATAT |
| D58 | AN05 for mt-tRNA <sup>Glu</sup>      | GACTACAACCAC                                | GGTAGTAGGATGGCGATCCG | CCAATGATAT |
| D59 | Disruptor for mt-tRNA <sup>Glu</sup> | TGGTATTCTCGCACGGAC                          |                      |            |

[a] Alk = 5-hexynyl, E<sub>3</sub> = triethylene glycol

## SUPPORTING INFORMATION

**Table S3.** Summary of enrichment data and cleavage activity for deoxyribozymes reported in this study.

| Deoxyribozyme        | $\log_2 f_{CA}^{[a]}$ | $\log_2 f_{CA, neg}^{[b]}$ | Cleavage site                 | N <sup>[c]</sup> | Activity, FC <sup>[d]</sup> ( $k_{obs} \cdot 10^{-3} \text{ min}^{-1}$ ) <sup>[e]</sup> |                  |                  |                  |
|----------------------|-----------------------|----------------------------|-------------------------------|------------------|-----------------------------------------------------------------------------------------|------------------|------------------|------------------|
|                      |                       |                            |                               |                  | C                                                                                       | m <sup>3</sup> C | m <sup>2</sup> C | m <sup>5</sup> C |
| AK12                 | 4.76                  | -2.94 (AL)                 | AN   CG                       | A                | 12                                                                                      | 0                | 2                | 2                |
|                      |                       |                            |                               | G                | 89                                                                                      | 0                | 69               | 49               |
|                      |                       |                            |                               | C                | 0                                                                                       | 0                | 0                | 0                |
|                      |                       |                            |                               | U                | 6                                                                                       | 0                | 0                | 0                |
| AK13                 | 1.32                  | -4.36 (AL)                 | AN   CG                       | A                | 12                                                                                      | 0                | 0                | 0                |
|                      |                       |                            |                               | G                | 77                                                                                      | 0                | 48               | 51               |
|                      |                       |                            |                               | C                | 0                                                                                       | 0                | 0                | 0                |
|                      |                       |                            |                               | U                | 3                                                                                       | 0                | 0                | 0                |
| AK104 <sup>[f]</sup> | 10.64                 | -5.15 (AM)<br>-12.91 (AN)  | AN   CG<br>A   NCG<br>AN   CG | A                | 95                                                                                      | 0                | 0                | 0                |
|                      |                       |                            |                               | G                | 94                                                                                      | 0                | 0                | 0                |
|                      |                       |                            |                               | C                | 0                                                                                       | 29               | 0                | 0                |
|                      |                       |                            |                               | U                | 85(3.2)                                                                                 | 0                | 0                | 0                |
| AK118                | 4.73                  | -8.94 (AN)<br>-6.28 (AL)   | AN   CG                       | A                | 0                                                                                       | 0                | 0                | 0                |
|                      |                       |                            |                               | G                | 62                                                                                      | 0                | 30               | 53               |
|                      |                       |                            |                               | C                | 0                                                                                       | 0                | 0                | 0                |
|                      |                       |                            |                               | U                | 23                                                                                      | 10               | 3                | 12               |
| AL01                 | -0.49                 | -1.45                      | AN   CG                       | A                | 12                                                                                      | 27               | 14               | 9                |
|                      |                       |                            |                               | G                | 12                                                                                      | 29               | 14               | 8                |
|                      |                       |                            |                               | C                | 0                                                                                       | 0                | 0                | 0                |
|                      |                       |                            |                               | U                | 0                                                                                       | 0                | 0                | 0                |
| AL04                 | 13.04                 | 2.39                       | AN   CG                       | A                | 0                                                                                       | 0                | 0                | 0                |
|                      |                       |                            |                               | G                | 13                                                                                      | 58               | 1                | 4                |
|                      |                       |                            |                               | C                | 0                                                                                       | 24               | 0                | 0                |
|                      |                       |                            |                               | U                | 0                                                                                       | 0                | 0                | 0                |
| AL07                 | 3.00                  | -1.30                      | AN   CG                       | A                | 0                                                                                       | 15               | 0                | 0                |
|                      |                       |                            |                               | G                | 0                                                                                       | 11               | 1                | 0                |
|                      |                       |                            |                               | C                | 2                                                                                       | 60               | 7                | 0                |
|                      |                       |                            |                               | U                | 27                                                                                      | 87               | 53               | 21               |
| AL12                 | -3.18                 | -4.17                      | AN   CG                       | A                | 0                                                                                       | 13               | 6                | 0                |
|                      |                       |                            |                               | G                | 18                                                                                      | 28               | 23               | 13               |
|                      |                       |                            |                               | C                | 0                                                                                       | 0                | 0                | 0                |
|                      |                       |                            |                               | U                | 0                                                                                       | 0                | 0                | 0                |
| AL13                 | 11.32                 | 4.07                       | ANC   G                       | A                | <1                                                                                      | 68               | 0                | 0                |
|                      |                       |                            |                               | G                | 6                                                                                       | 73               | 14               | 8                |
|                      |                       |                            |                               | C                | 0                                                                                       | 3                | 0                | 0                |
|                      |                       |                            |                               | U                | <1                                                                                      | 12               | 0                | 0                |
| AL15                 | -0.86                 | -3.19                      | AN   CG                       | A                | 0                                                                                       | 31               | 3                | 0                |
|                      |                       |                            |                               | G                | 25                                                                                      | 63               | 47               | 17               |
|                      |                       |                            |                               | C                | 0                                                                                       | 7                | 1                | 0                |
|                      |                       |                            |                               | U                | 1                                                                                       | 11               | 4                | 2                |
| AL18                 | 1.41                  | 0.53                       | AN   CG                       | A                | 2                                                                                       | 3                | 3                | 2                |
|                      |                       |                            |                               | G                | 40                                                                                      | 26               | 45               | 26               |
|                      |                       |                            |                               | C                | 0                                                                                       | 0                | 0                | 0                |
|                      |                       |                            |                               | U                | 0                                                                                       | 0                | 0                | 0                |
| AL21                 | 7.90                  | 4.17                       | AN   CG                       | A                | 0                                                                                       | 5                | 0                | 0                |
|                      |                       |                            |                               | G                | 0                                                                                       | 4                | 0                | 0                |
|                      |                       |                            |                               | C                | <1                                                                                      | 30               | 2                | 0                |
|                      |                       |                            |                               | U                | 6                                                                                       | 55               | 15               | 5                |
| AL107                | 2.93                  | -1.37                      | AN   CG                       | A                | 0                                                                                       | 14               | 0                | 0                |
|                      |                       |                            |                               | G                | 0                                                                                       | 9                | 0                | 0                |
|                      |                       |                            |                               | C                | 0                                                                                       | 54               | 2                | 0                |
|                      |                       |                            |                               | U                | 21                                                                                      | 93               | 45               | 18               |
| AL112 <sup>[f]</sup> | -2.94                 | -                          | AN   CG                       | A                | 0                                                                                       | 45               | 0                | 0                |
|                      |                       |                            |                               | G                | 0                                                                                       | 40               | 0                | 0                |
|                      |                       |                            |                               | C                | 0                                                                                       | 57               | 0                | 0                |
|                      |                       |                            |                               | U                | 3(0.06)                                                                                 | 70(1.8)          | 10(0.2)          | 4(0.08)          |
| AM05                 | 12.82                 | 1.64                       | ANC   G                       | A                | 0                                                                                       | 0                | 0                | 0                |
|                      |                       |                            |                               | G                | 0                                                                                       | 0                | 3                | 0                |
|                      |                       |                            |                               | C                | 0                                                                                       | 0                | 0                | 0                |
|                      |                       |                            |                               | U                | 66                                                                                      | 8                | 81               | 56               |
| AM17                 | 5.48                  | 2.21                       | AN   CG                       | A                | 0                                                                                       | 0                | 0                | 0                |
|                      |                       |                            |                               | G                | 47                                                                                      | 49               | 18               | 39               |
|                      |                       |                            |                               | C                | 0                                                                                       | 0                | 0                | 0                |
|                      |                       |                            |                               | U                | 0                                                                                       | 0                | 0                | 0                |

## SUPPORTING INFORMATION

| Deoxyribozyme        | $\log_2 f_{CA}^{[a]}$ | $\log_2 f_{CA,neg}^{[b]}$ | Cleavage site | N <sup>[c]</sup> | Activity, FC <sup>[d]</sup> ( $k_{obs} \cdot 10^{-3} \text{ min}^{-1}$ ) <sup>[e]</sup> |                  |                  |                  |
|----------------------|-----------------------|---------------------------|---------------|------------------|-----------------------------------------------------------------------------------------|------------------|------------------|------------------|
|                      |                       |                           |               |                  | C                                                                                       | m <sup>3</sup> C | m <sup>4</sup> C | m <sup>5</sup> C |
| AM18                 | 4.28                  | 1.56                      | AN   CG       | A                | 0                                                                                       | 0                | 0                | 0                |
|                      |                       |                           |               | G                | 21                                                                                      | 24               | 17               | 12               |
|                      |                       |                           |               | C                | 0                                                                                       | 0                | 0                | 0                |
|                      |                       |                           |               | U                | 0                                                                                       | 0                | 0                | 0                |
| AM21                 | 0.59                  | -6.63                     | AN   CG       | A                | 29                                                                                      | 71               | 72               | 35               |
|                      |                       |                           |               | G                | 6                                                                                       | 14               | 3                | 4                |
|                      |                       |                           |               | C                | 0                                                                                       | 0                | 0                | 0                |
|                      |                       |                           |               | U                | 9                                                                                       | 8                | 9                | 8                |
| AM101 <sup>[f]</sup> | 10.02                 | 1.41                      | ANC   G       | A                | 0                                                                                       | 0                | 0                | 0                |
|                      |                       |                           |               | G                | 0                                                                                       | 0                | 0                | 0                |
|                      |                       |                           |               | C                | 0                                                                                       | 0                | 22               | 0                |
|                      |                       |                           |               | U                | 18(0.5)                                                                                 | 0                | 73(5.3)          | 0                |
| AM102                | 6.38                  | -2.90                     | ANC   G       | A                | 27                                                                                      | 44               | 52               | 25               |
|                      |                       |                           |               | G                | 71                                                                                      | 74               | 82               | 64               |
|                      |                       |                           |               | C                | 49                                                                                      | 47               | 84               | 57               |
|                      |                       |                           |               | U                | 88                                                                                      | 71               | 91               | 88               |
| AM106                | 7.78                  | 4.61                      | AN   CG       | A                | 9                                                                                       | 0                | 0                | 0                |
|                      |                       |                           |               | G                | 81                                                                                      | 0                | 55               | 31               |
|                      |                       |                           |               | C                | 0                                                                                       | 0                | 0                | 0                |
|                      |                       |                           |               | U                | 0                                                                                       | 0                | 0                | 0                |
| AM108                | 5.86                  | 0.21                      | AN   CG       | A                | 10                                                                                      | 19               | 15               | 7                |
|                      |                       |                           |               | G                | 42                                                                                      | 41               | 50               | 29               |
|                      |                       |                           |               | C                | 0                                                                                       | 0                | 0                | 0                |
|                      |                       |                           |               | U                | 0                                                                                       | 0                | 0                | 0                |
| AN03                 | 2.07                  | -0.01                     | AN   CG       | A                | 0                                                                                       | 10               | 5                | 6                |
|                      |                       |                           |               | G                | 17                                                                                      | 13               | 12               | 13               |
|                      |                       |                           |               | C                | 0                                                                                       | 1                | 0                | 0                |
|                      |                       |                           |               | U                | 0                                                                                       | 0                | 0                | 0                |
| AN04                 | 3.15                  | 2.28                      | AN   CG       | A                | 16                                                                                      | 0                | 6                | 4                |
|                      |                       |                           |               | G                | 78                                                                                      | 0                | 66               | 73               |
|                      |                       |                           |               | C                | 0                                                                                       | 0                | 0                | 0                |
|                      |                       |                           |               | U                | 5                                                                                       | 0                | 2                | 12               |
| AN05 <sup>[f]</sup>  | 12.35                 | -4.68                     | A   NCG       | A                | 0                                                                                       | 0                | 0                | 0                |
|                      |                       |                           |               | G                | 0                                                                                       | 0                | 0                | 0                |
|                      |                       |                           |               | C                | 0                                                                                       | 0                | 0                | 0                |
|                      |                       |                           |               | U                | 33(0.7)                                                                                 | 0                | 0                | 90(6.7)          |
| AN07                 | 9.29                  | 3.01                      | AN   CG       | A                | 0                                                                                       | 0                | 0                | 0                |
|                      |                       |                           |               | G                | 0                                                                                       | 0                | 0                | 0                |
|                      |                       |                           |               | C                | 0                                                                                       | 0                | 0                | 0                |
|                      |                       |                           |               | U                | 47                                                                                      | 0                | 28               | 39               |
| AN19                 | 3.81                  | -3.05                     | AN   CG       | A                | 0                                                                                       | 22               | 0                | 0                |
|                      |                       |                           |               | G                | 0                                                                                       | 9                | 2                | 0                |
|                      |                       |                           |               | C                | 0                                                                                       | 2                | 0                | 0                |
|                      |                       |                           |               | U                | 67                                                                                      | 60               | 82               | 62               |
| AN109                | 8.96                  | -4.81                     | ANC   G       | A                | 25                                                                                      | 42               | 49               | 28               |
|                      |                       |                           |               | G                | 86                                                                                      | 71               | 87               | 67               |
|                      |                       |                           |               | C                | 43                                                                                      | 47               | 83               | 62               |
|                      |                       |                           |               | U                | 88                                                                                      | 79               | 93               | 93               |

| Color code | Activity | FC <sup>[d]</sup> range |
|------------|----------|-------------------------|
|            | Low      | $0 \leq FC < 10$        |
|            | Moderate | $10 \leq FC < 50$       |
|            | High     | $50 \leq FC \leq 100$   |

<sup>[a]</sup>  $\log_2$  fold change in abundance between rounds 18 and 7 of the modification-specific selection (AK for C, AL for m<sup>3</sup>C, AM for m<sup>4</sup>C and AN for m<sup>5</sup>C)  $\log_2 f_{CA}$  is defined as  $\log_2(\text{CPM}_{R18} / \text{CPM}_{R7})$ , where  $\text{CPM}_{R18}$  is the read counts per million for the corresponding deoxyribozyme in round 18, and  $\text{CPM}_{R7}$  is read counts per million in round 7. <sup>[b]</sup>  $\log_2$  fold abundance change between rounds 18 and 7 of the negative selection (AK for m<sup>3</sup>C, m<sup>4</sup>C, m<sup>5</sup>C). <sup>[c]</sup> Nucleotide preceding the target cytosine site in the RNA substrate. <sup>[d]</sup> Fraction cleaved (%) after 6 h incubation (100 pmol deoxyribozyme, 10 pmol RNA substrate, 20 mM MgCl<sub>2</sub>, 50 mM Tris-HCl, 150 mM NaCl, pH 7.5). <sup>[e]</sup> Observed kinetic constants for single-turnover cleavage. <sup>[f]</sup> The activity assays were performed at least twice to check for reproducibility. Mean FC values are presented.

## SUPPORTING INFORMATION

## Supporting figures

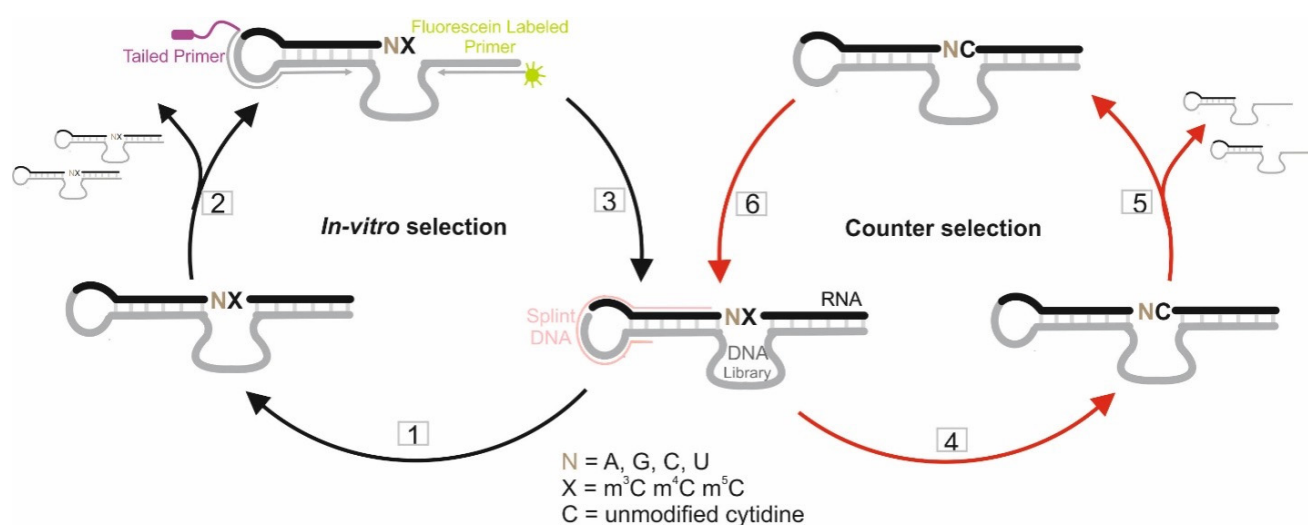

**Figure S1.** Schematic of *in vitro* selection of RNA-cleaving deoxyribozymes sensitive to m<sup>3</sup>C, m<sup>4</sup>C or m<sup>5</sup>C modifications (AL, AM and AN selections, respectively): 1) Ligation of DNA library to modified RNA (R2, R3, R4). 2) Incubation in presence of MgCl<sub>2</sub>. The cleaved fraction is isolated by PAGE. 3) PCR amplification of active fraction. 4) Ligation of DNA library to unmodified RNA (R1). 5) Incubation in presence of MgCl<sub>2</sub>. The uncleaved fraction is isolated by PAGE. 6) PCR amplification of uncleaved fraction.

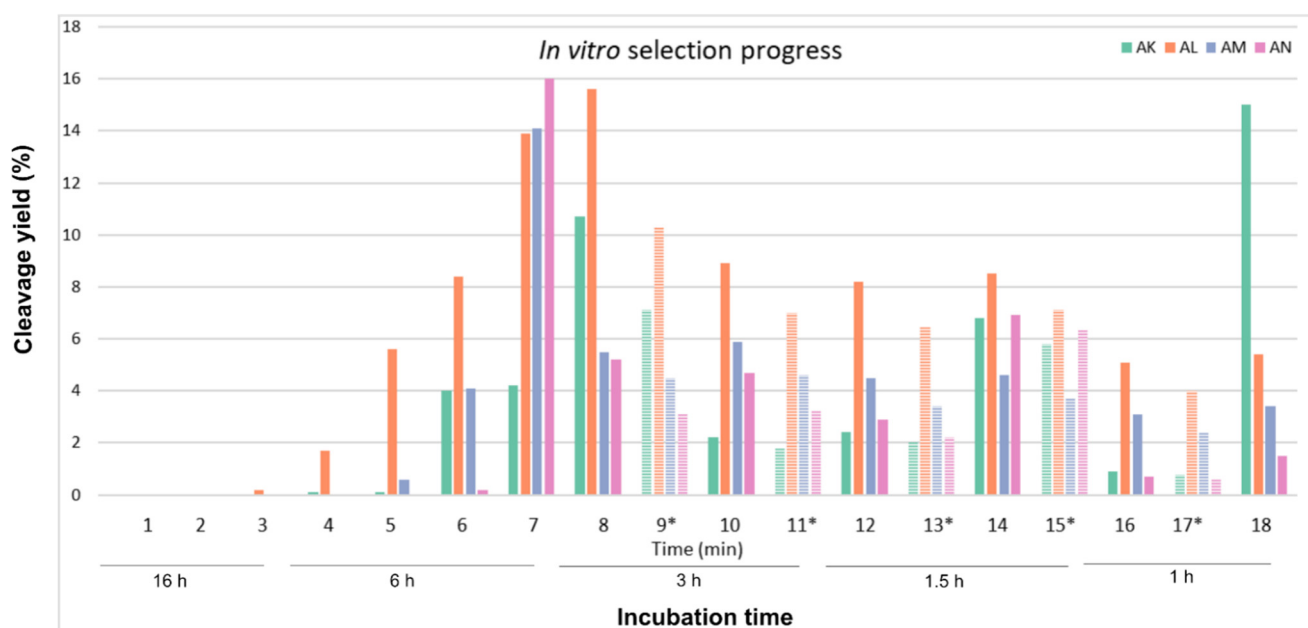

**Figure S2.** Progress of *in vitro* selection plotted as cleavage yield in every selection round. From round 4, cleavage activity was visible and cleavage yield was determined by quantification of fluorescent bands in the selection step. The counter selection rounds are marked with asterisks and incubation time was 16 h for every counter selection round.

## SUPPORTING INFORMATION

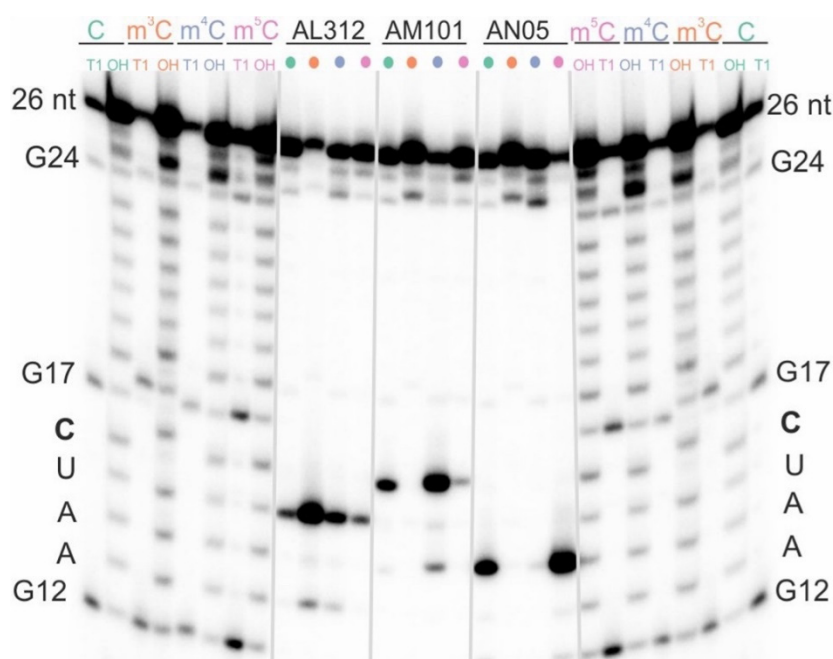

**Figure S3.** PAGE analysis of RNA cleavage mediated by deoxyribozymes AL112, AM101 and AN05 and comparison of cleavage activity for unmodified (green), m<sup>3</sup>C- (orange), m<sup>4</sup>C- (blue), and m<sup>5</sup>C-modified (magenta) RNA. 5'-Radioactively labeled RNA was incubated with DNA enzymes in presence of 20 mM MgCl<sub>2</sub> at 37 °C for 6 h. Lanes OH: alkaline hydrolysis of RNA in presence of 25 mM NaOH at 95 °C for 3 min. Lanes T1: RNase T1 ladder showing positions of Gs in the RNA substrate.

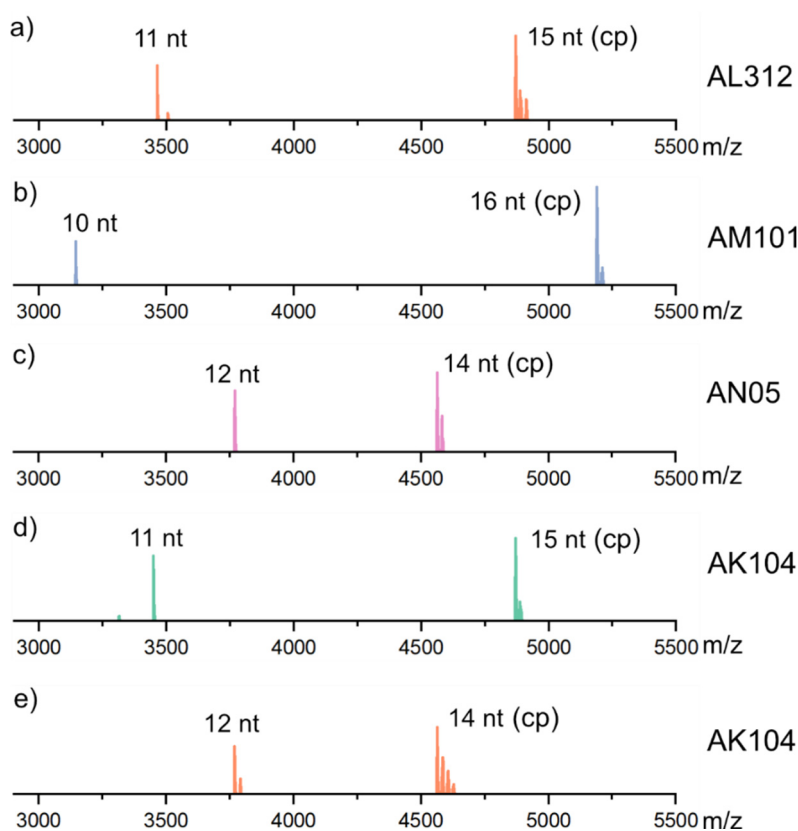

**Figure S4.** High-resolution electrospray ionization mass spectrometry (HR-ESI-MS) analysis of cleaved products for AL112, AM101, AN05 and AK104. a) RNA fragments formed by cleavage of R12 (Um<sup>3</sup>C) with AL312. b) RNA fragments formed by cleavage of R16 (Um<sup>4</sup>C) with AM101. c) RNA fragments formed by cleavage of R20 (Um<sup>5</sup>C). d) AK104 cleaved R8 (UC motif) with formation of 15-nt fragment which contained 2',3'-cyclic phosphate (cp) and 11-nt fragment which contained 5'-OH. e) AK104 shifted its cleavage site one nucleotide upstream in reaction with R11 (Cm<sup>3</sup>C) as confirmed by formation of 14-nt and 12-nt fragments.

## SUPPORTING INFORMATION

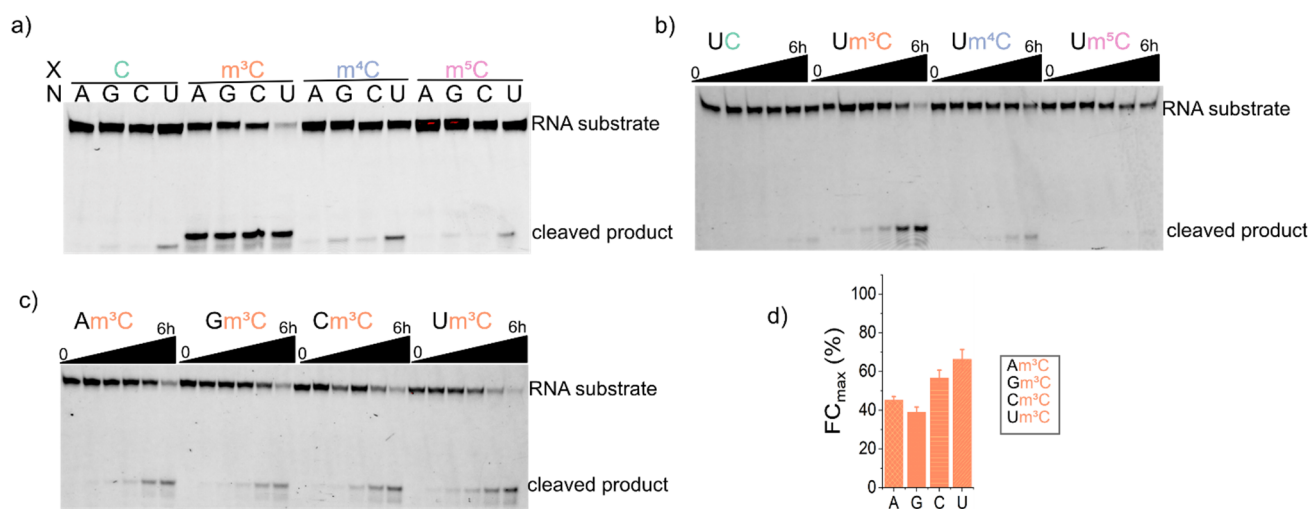

**Figure S5.** Activity assays for deoxyribozyme AL112. Cleavage yields (FC) and  $k_{\text{obs}}$  values are presented in Table S3. a) Gel image for cleavage of R5–R20. X – modification at the target cytosine site. N – nucleotide preceding the target cytosine site. Conditions: 100 pmol deoxyribozyme, 10 pmol RNA substrate, 20 mM MgCl<sub>2</sub>, 50 mM Tris-HCl, 150 mM NaCl, pH 7.5, 37 °C, 6 h. b) Gel-based kinetics assays for cleavage of R8 (UC), R12 (Um<sup>3</sup>C), R16 (Um<sup>4</sup>C) and R20 (Um<sup>5</sup>C). Time points: 0, 10, 30, 60, 180, 360 min. Kinetics plots are presented in Figure 2b. c) Gel-based kinetics assay for cleavage of R9 (Am<sup>3</sup>C), R10 (Gm<sup>3</sup>C), R11 (Cm<sup>3</sup>C) and R12 (Um<sup>3</sup>C). d) Comparison of FC values obtained after 6 h cleavage of R9–R12. Each bar represents the mean from three independent experiments with error bars showing the  $\pm$  SD.

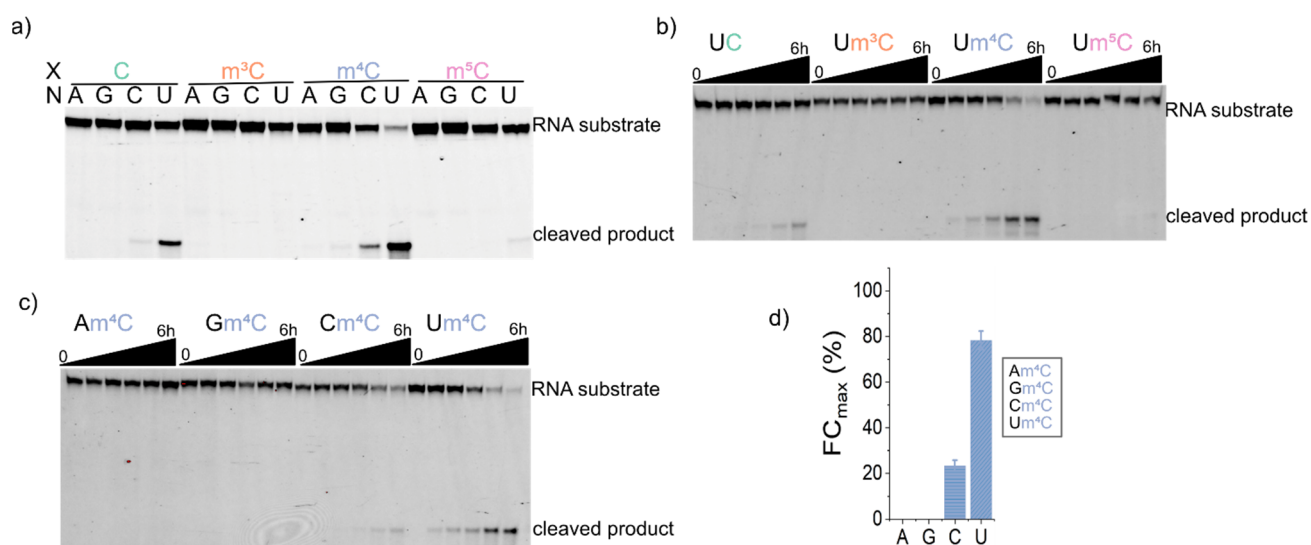

**Figure S6.** Activity assays for deoxyribozyme AM101. Cleavage yields (FC) and  $k_{\text{obs}}$  values are presented in Table S3. a) Gel image for cleavage of R5–R20. X – modification at the target cytosine site. N – nucleotide preceding the target cytosine site. Conditions: 100 pmol deoxyribozyme, 10 pmol RNA substrate, 20 mM MgCl<sub>2</sub>, 50 mM Tris-HCl, 150 mM NaCl, pH 7.5, 37 °C, 6 h. b) Gel-based kinetics assays for cleavage of R8 (UC), R12 (Um<sup>3</sup>C), R16 (Um<sup>4</sup>C) and R20 (Um<sup>5</sup>C). Time points: 0, 10, 30, 60, 180, 360 min. Kinetics plots are presented in Figure 2b. c) Gel-based kinetics assay for cleavage of R13 (Am<sup>4</sup>C), R14 (Gm<sup>4</sup>C), R15 (Cm<sup>4</sup>C) and R16 (Um<sup>4</sup>C). d) Comparison of FC values obtained after 6 h cleavage of R13–R16. Each bar represents the mean from three independent experiments with error bars showing the  $\pm$  SD.



## SUPPORTING INFORMATION

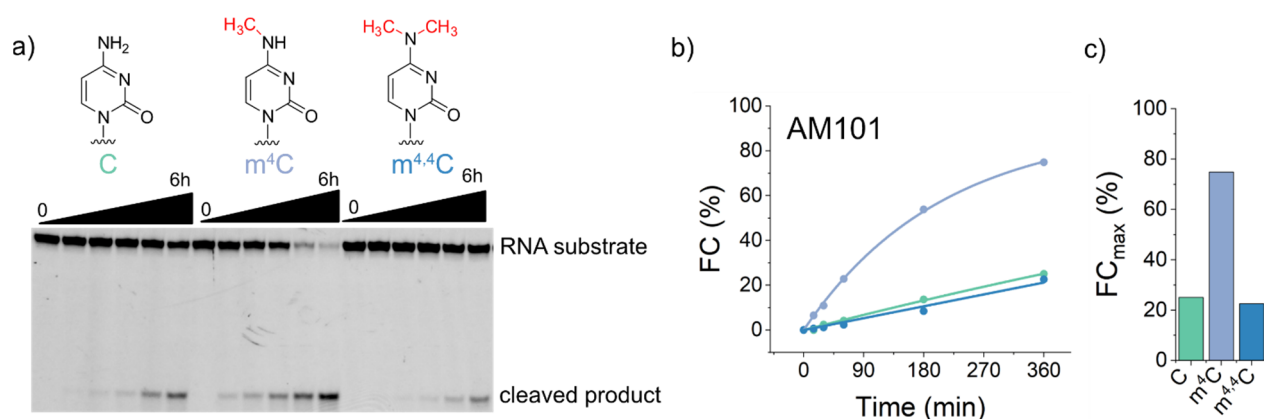

**Figure S7.** Single-turnover cleavage of unmodified, m<sup>4</sup>C-modified and m<sup>4,4</sup>C-modified RNA substrates with m<sup>4</sup>C-specific deoxyribozyme AM101. a) Gel images for cleavage of R8, R20 and R27. Conditions: 100 pmol deoxyribozyme, 10 pmol RNA substrate, 20 mM MgCl<sub>2</sub>, 50 mM Tris-HCl, 150 mM NaCl, pH 7.5, 37 °C, 6 h. b) Kinetic plots. d) Comparison of FC values obtained after 6 h cleavage.

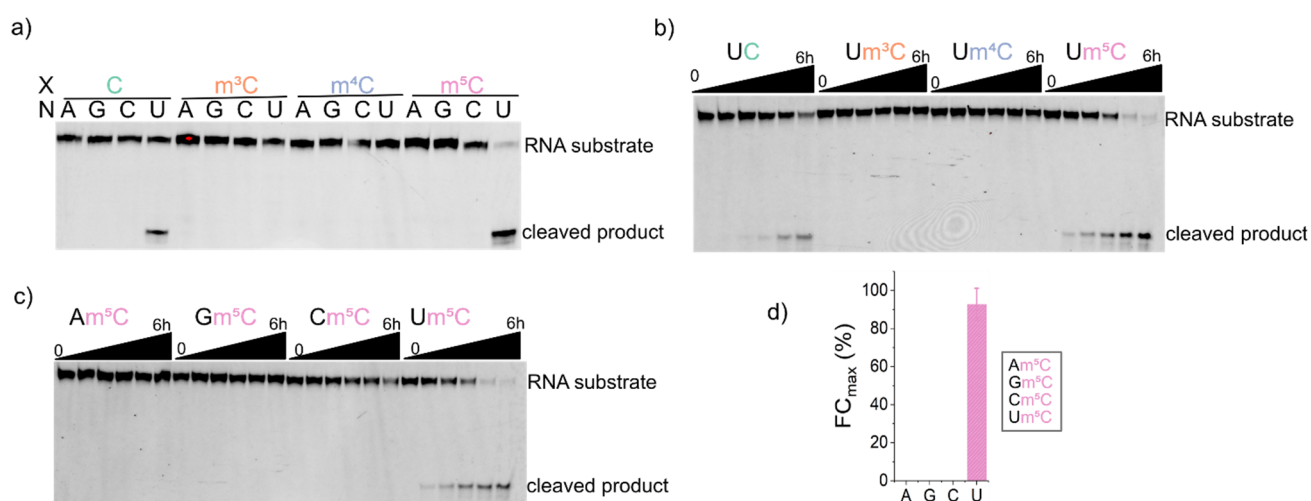

**Figure S8.** Activity assays for deoxyribozyme AN05. Cleavage yields (FC) and  $k_{\text{obs}}$  values are presented in Table S3. a) Gel image for cleavage of R5–R20. X – modification at the target cytosine site. N – nucleotide preceding the target cytosine site. Conditions: 100 pmol deoxyribozyme, 10 pmol RNA substrate, 20 mM MgCl<sub>2</sub>, 50 mM Tris-HCl, 150 mM NaCl, pH 7.5, 37 °C, 6 h. b) Gel-based kinetics assays for cleavage of R8 (UC), R12 (Um<sup>3</sup>C), R16 (Um<sup>4</sup>C) and R20 (Um<sup>5</sup>C). Time points: 0, 10, 30, 60, 180, 360 min. Kinetics plots are presented in Figure 2b. c) Gel-based kinetics assay for cleavage of R17 (Am<sup>5</sup>C), R18 (Gm<sup>5</sup>C), R19 (Cm<sup>5</sup>C) and R20 (Um<sup>5</sup>C). d) Comparison of FC values obtained after 6 h cleavage of R17–R20. Each bar represents the mean from three independent experiments with error bars showing the  $\pm$  SD.

## SUPPORTING INFORMATION

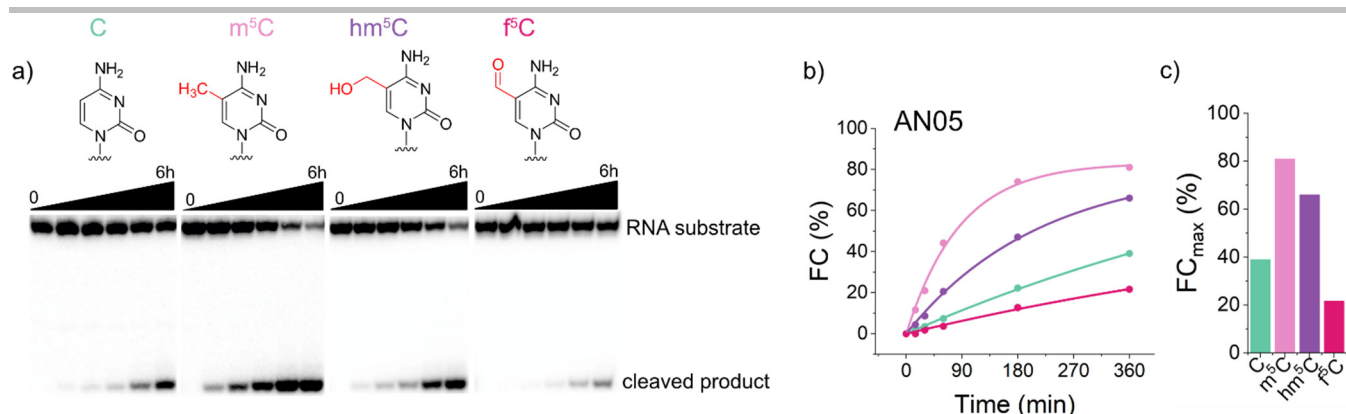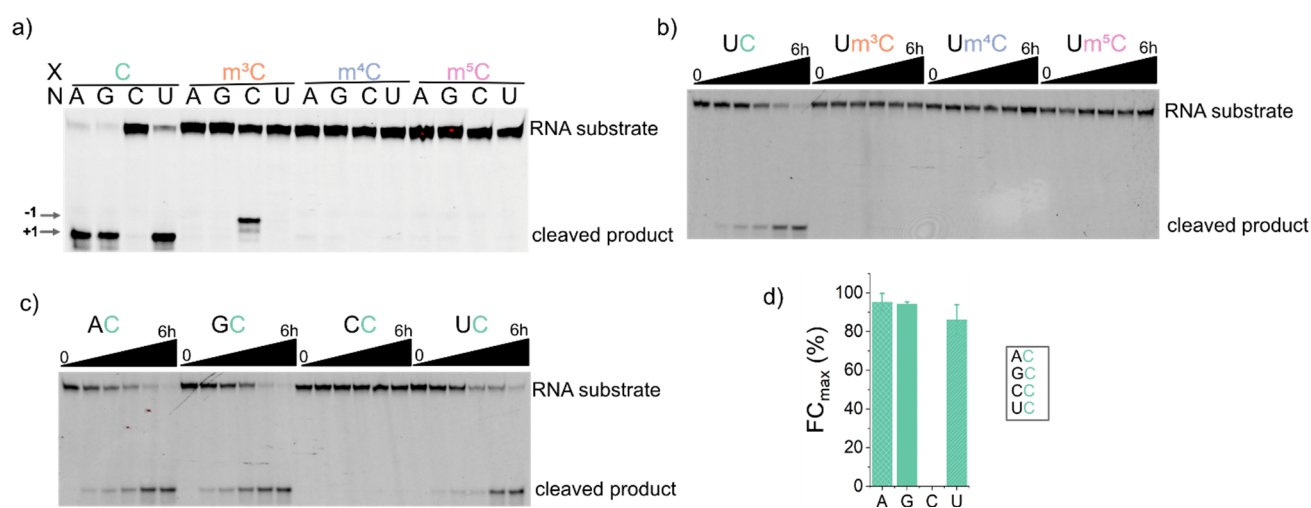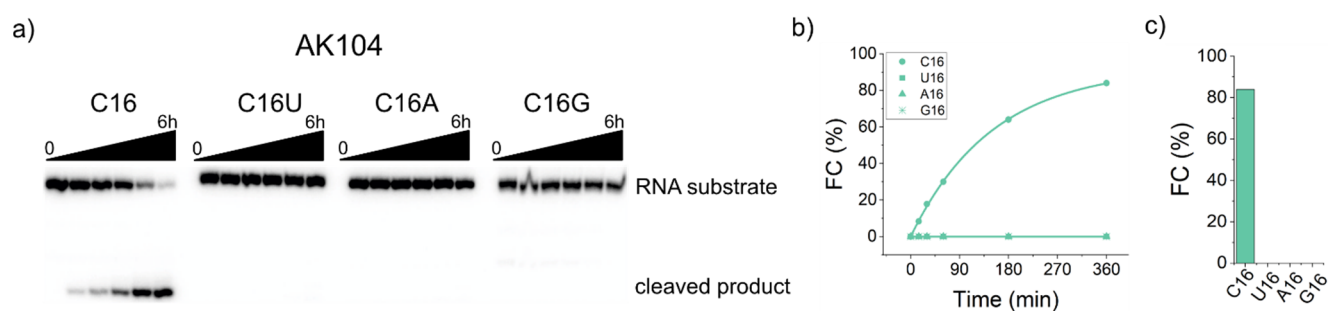

**Figure S11.** Single-turnover cleavage of the unmodified selection substrate and its C16U, C16A and C16G mutants with deoxyribozyme AK104. a) Gel images for cleavage of R28–R31. Conditions: 100 pmol deoxyribozyme, 10 pmol RNA substrate, 20 mM  $MgCl_2$ , 50 mM Tris-HCl, 150 mM NaCl, pH 7.5, 37 °C, 6 h. b) Kinetic plots. d) Comparison of FC values obtained after 6 h cleavage.

## SUPPORTING INFORMATION

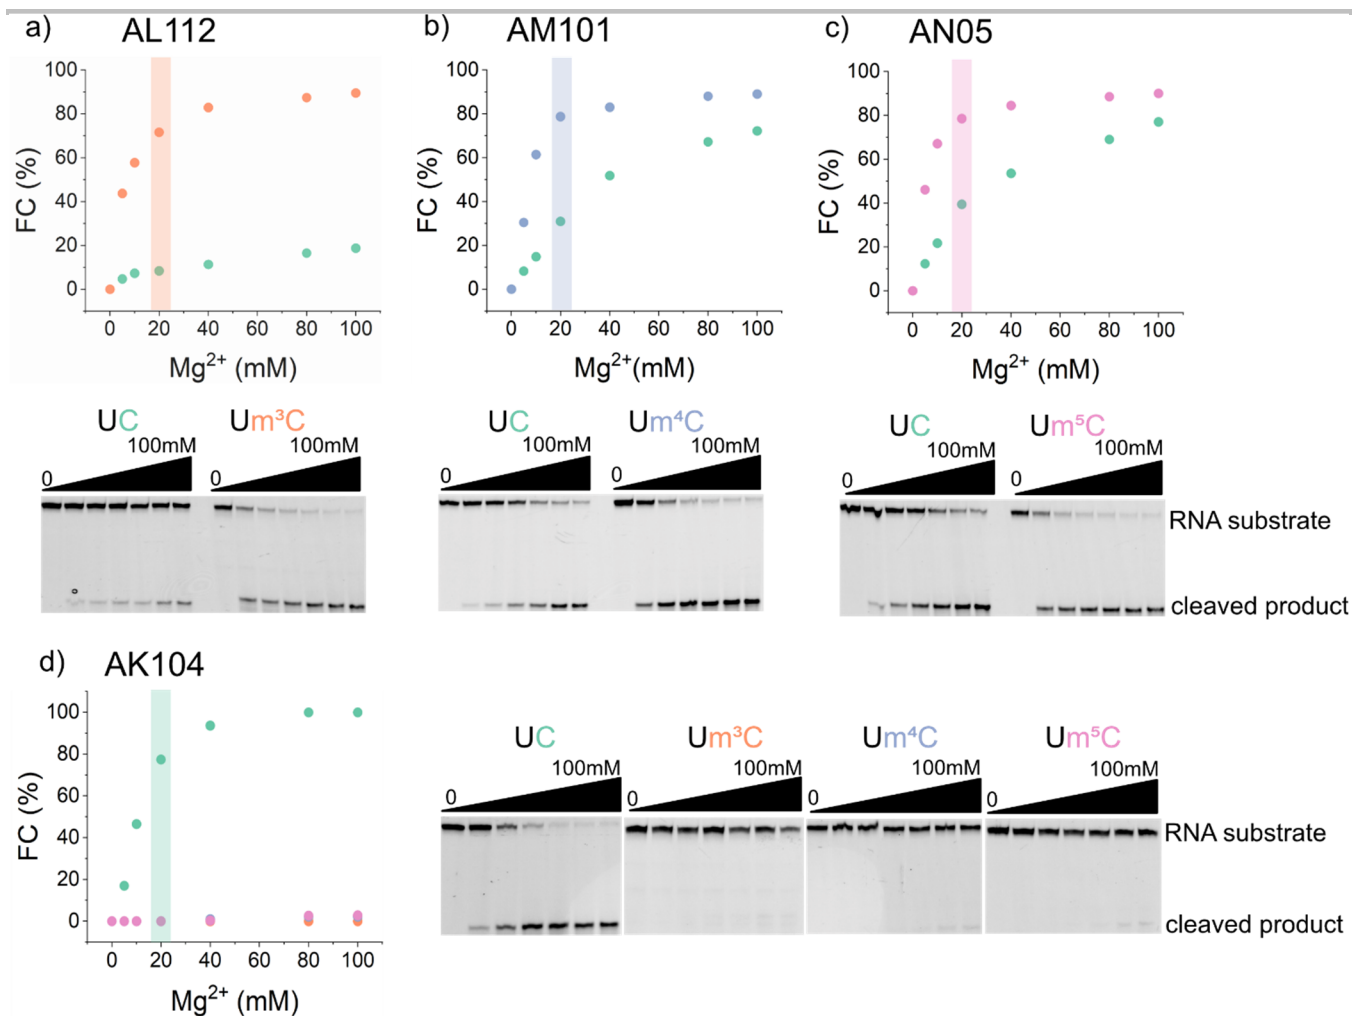

**Figure S12.** Dependence of cleavage yield on concentrations of Mg<sup>2+</sup> for the reactions of the selection substrates with deoxyribozymes AL112, AM101, AN05 and AK104. a)–c) Top panel: cleavage yields plotted vs concentration of Mg<sup>2+</sup> for deoxyribozymes AL112, AM101 and AN05, respectively. Bottom panel: gel images for cleavage of R8 and R12 with AL112 (a), R8 and R16 with AM101 (b), R8 and R20 with AN05 (c). d) Cleavage yields plotted vs concentration of Mg<sup>2+</sup> for deoxyribozyme AK104 (left). Gel images for cleavage of R8, R12, R16 and R20 with AK104 (right). Conditions: 100 pmol deoxyribozyme, 10 pmol RNA substrate, indicated concentration of MgCl<sub>2</sub>, 50 mM Tris-HCl, 150 mM NaCl, pH 7.5, 37 °C, 6 h.

## SUPPORTING INFORMATION

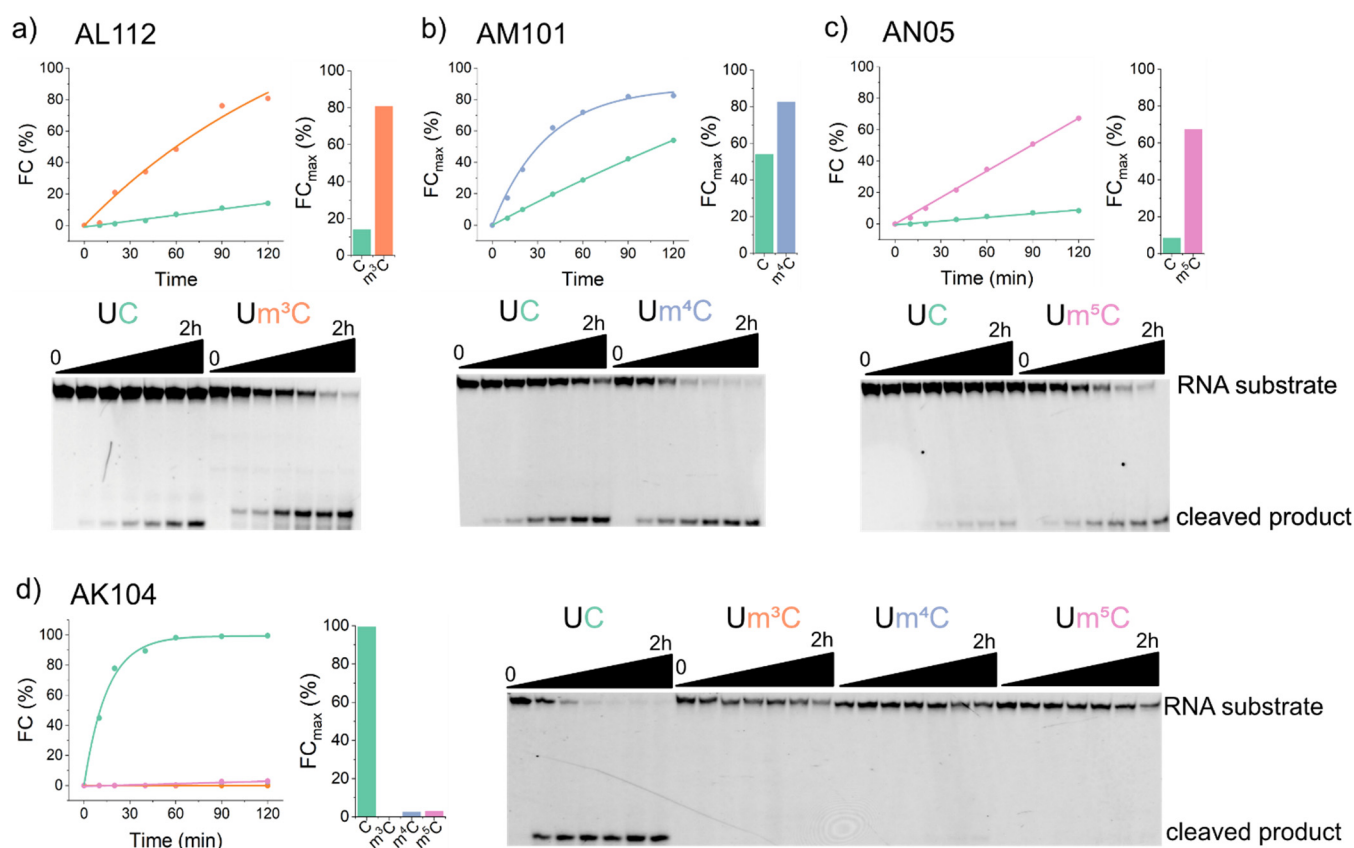

**Figure S13.** Cleavage activity of deoxyribozymes AL112, AM101, AN05 and AK104 in the presence of Mn<sup>2+</sup>. a)–c) Top panel: kinetic plots and comparison of FC values obtained after 2 h cleavage for deoxyribozymes AL112, AM101 and AN05, respectively. Bottom panel: gel images for cleavage of R8 and R12 with AL112 (a), R8 and R16 with AM101 (b), R8 and R20 with AN05 (c). d) kinetic plots and comparison of FC values obtained after 2 h cleavage for deoxyribozyme AK104 (left). Gel image for cleavage of R8, R12, R16 and R20 with AK104 (right). Conditions: 100 pmol deoxyribozyme, 10 pmol RNA substrate, 20 mM MnCl<sub>2</sub>, 50 mM Tris-HCl, 150 mM NaCl, pH 7.5, 37 °C, 2 h.

## SUPPORTING INFORMATION

## NMR Spectra

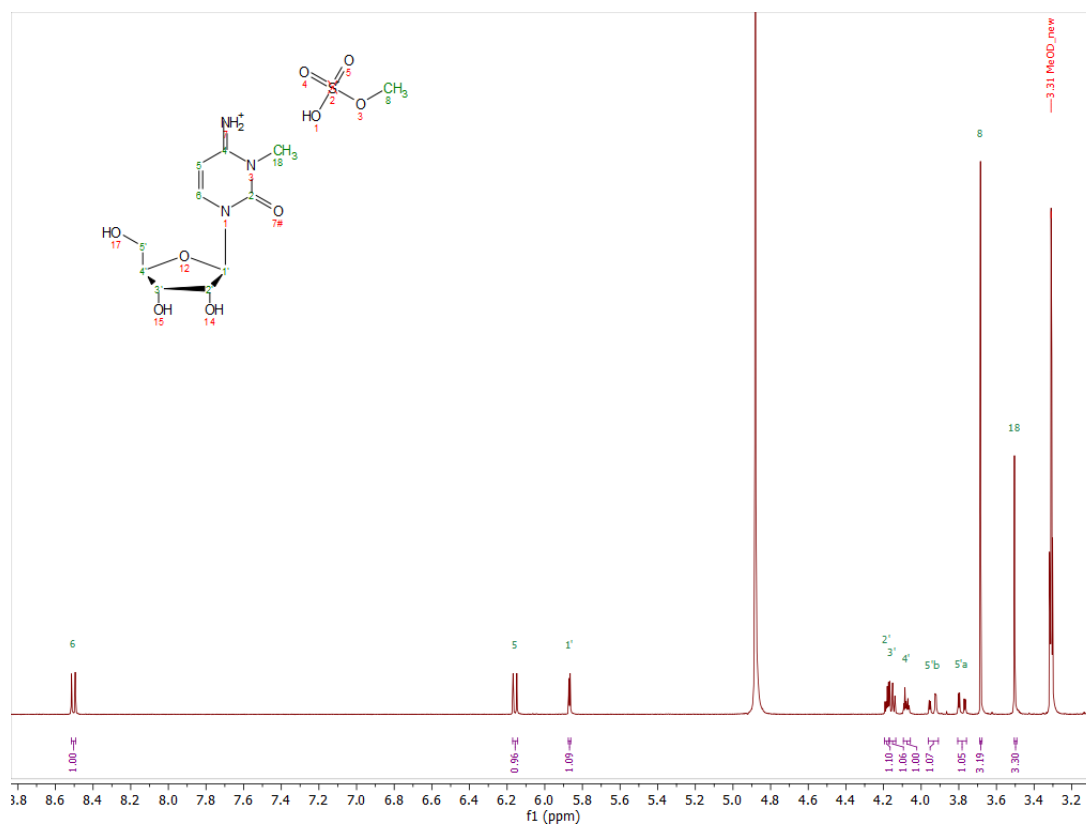<sup>1</sup>H-NMR (400 MHz, MeOD) of compound 1.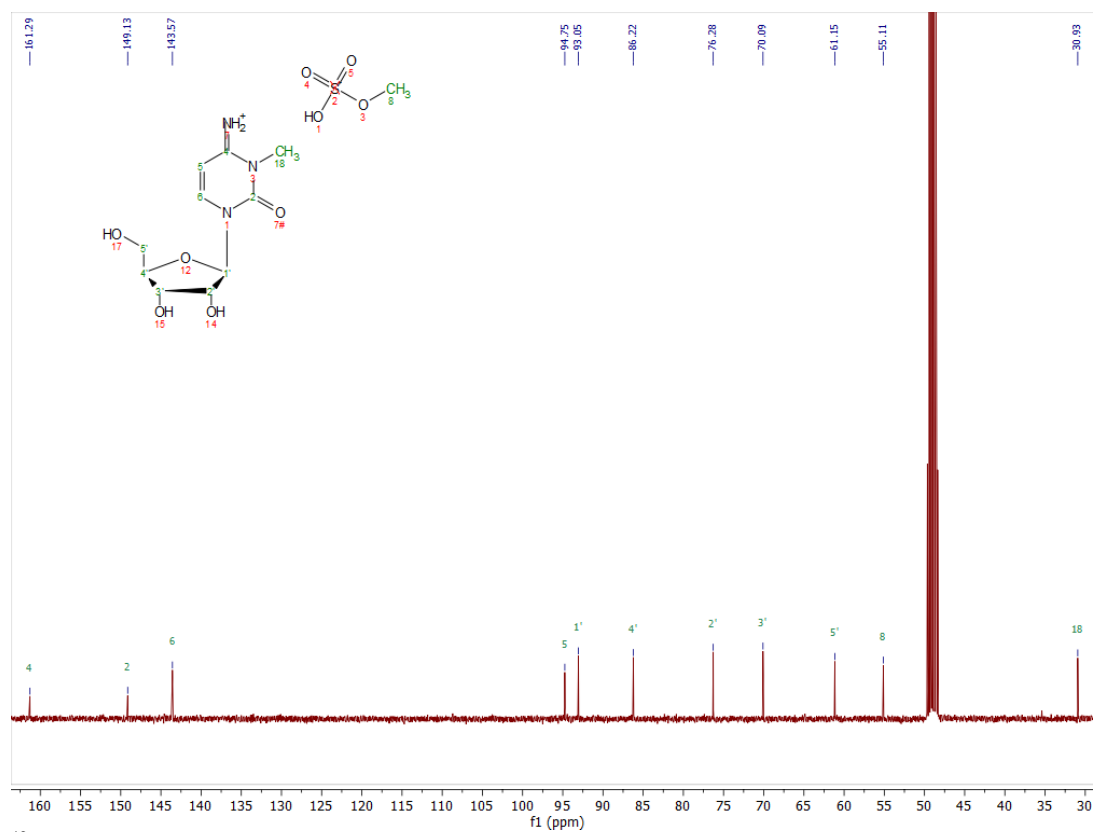<sup>13</sup>C-NMR (100 MHz, MeOD) of compound 1.



## SUPPORTING INFORMATION

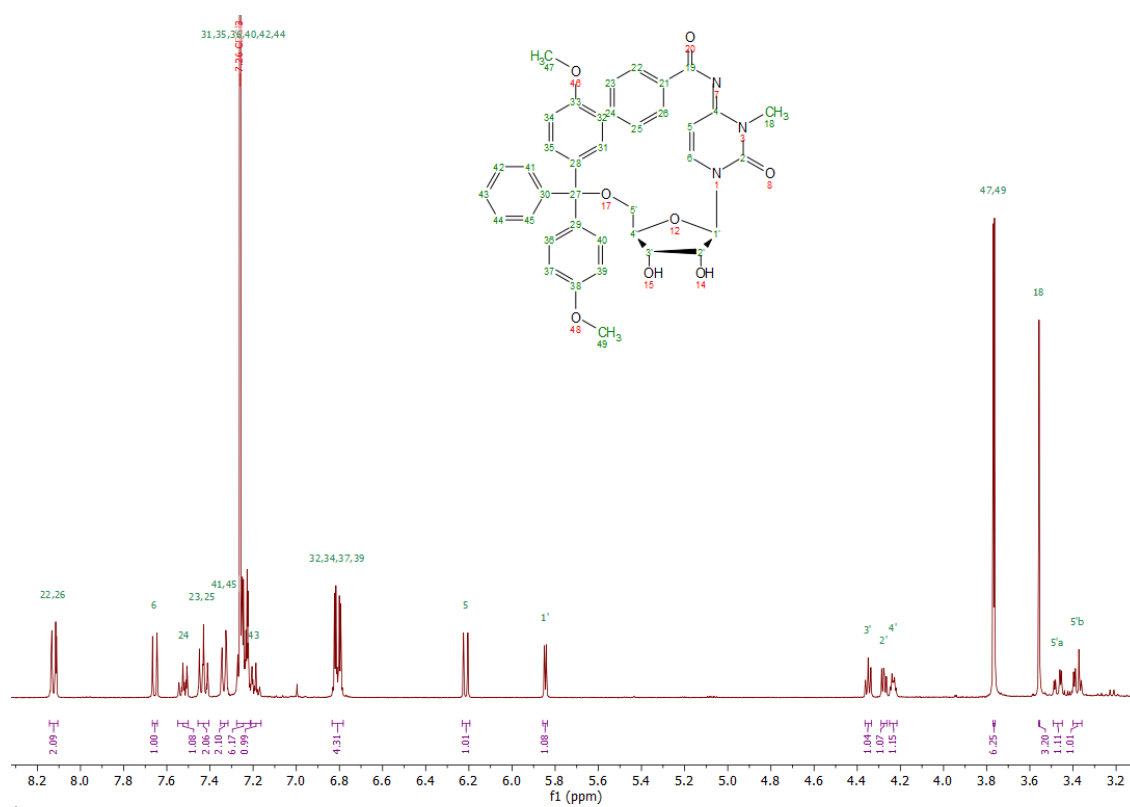**<sup>1</sup>H-NMR (400 MHz, CDCl<sub>3</sub>) of compound 3.**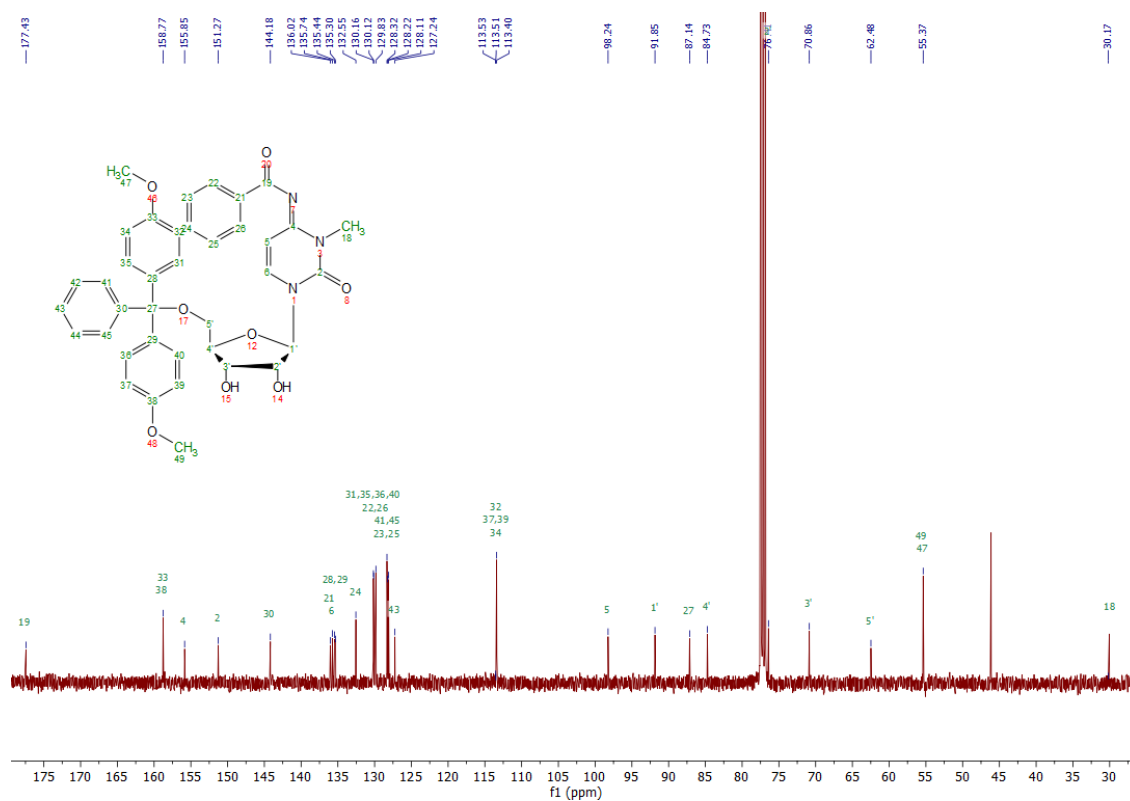**<sup>13</sup>C-NMR (100 MHz, CDCl<sub>3</sub>) of compound 3.**



## SUPPORTING INFORMATION

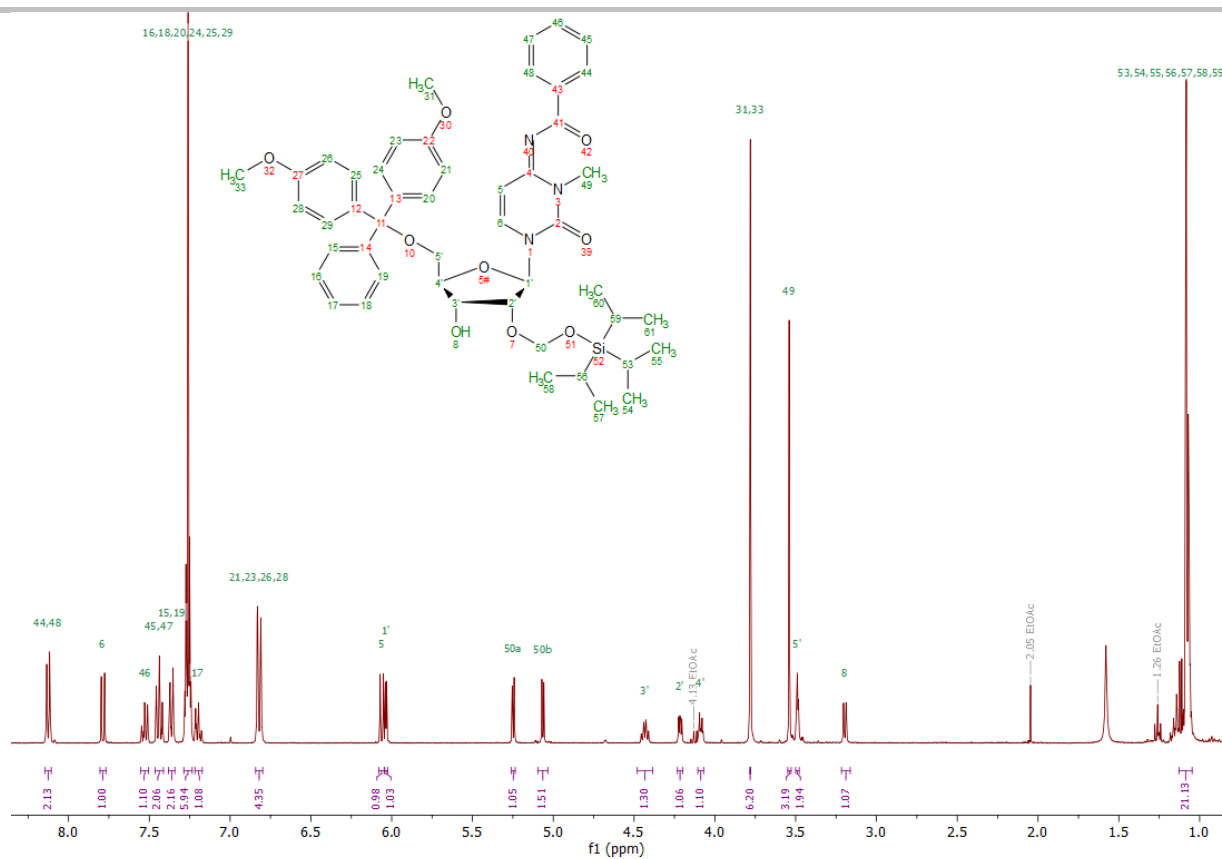

**<sup>1</sup>H-NMR (400 MHz, CDCl<sub>3</sub>) of compound 4.**

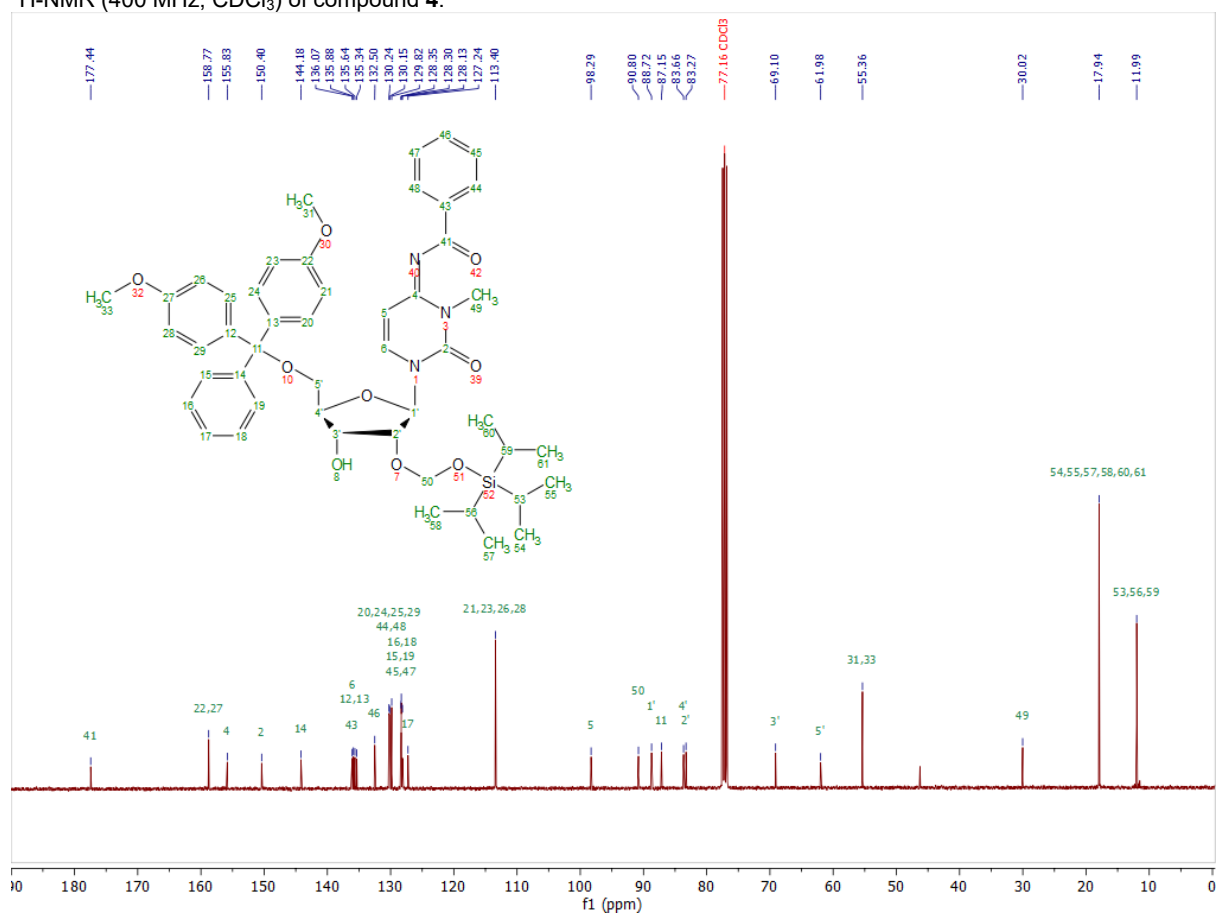

**<sup>13</sup>C-NMR (100 MHz, CDCl<sub>3</sub>) of compound 4.**



## SUPPORTING INFORMATION

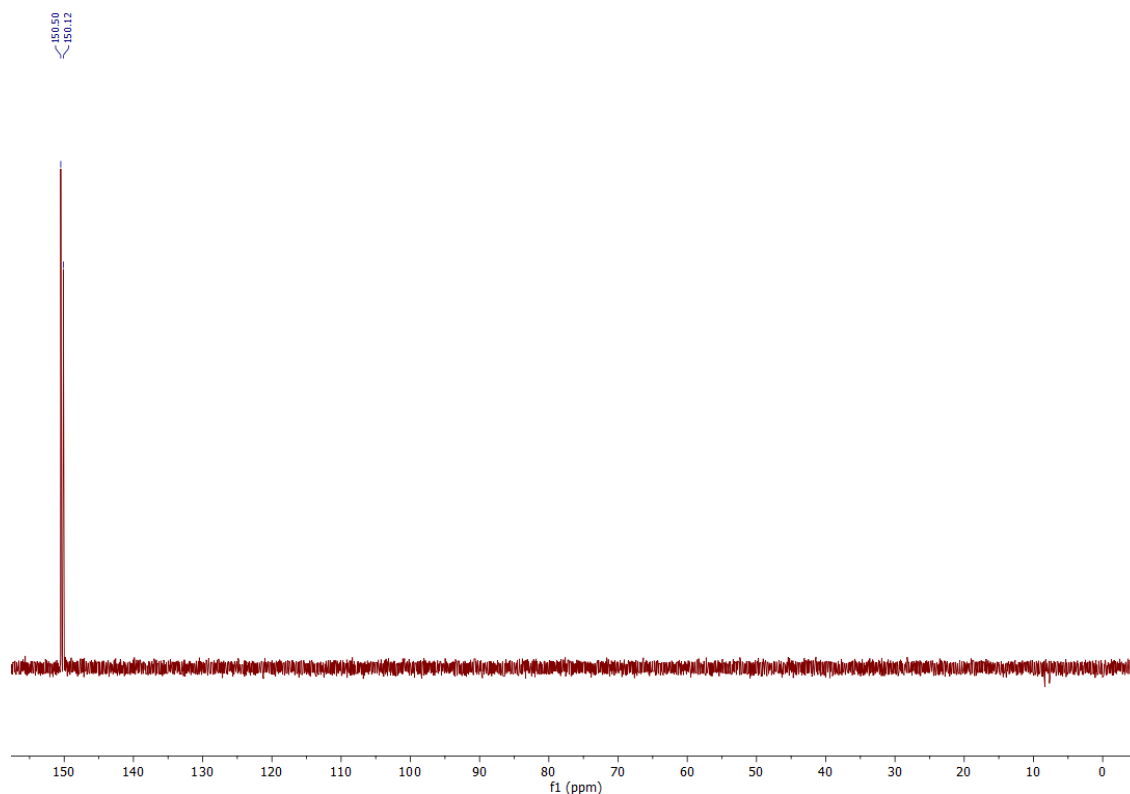

$^{31}\text{P}$ -NMR (162 MHz,  $\text{CDCl}_3$ ) of compound **5**.

## References

- [1] C. Höbartner, C. Kreutz, E. Flecker, E. Ottenschläger, W. Pils, K. Grubmayr, R. Micura, *Monatshefte für Chemie / Chemical Monthly* **2003**, *134*, 851-873.
- [2] M. Alvira, R. Eritja, *Chemistry & Biodiversity* **2007**, *4*, 2798-2809.
- [3] L. Büttner, J. Seikowski, K. Wawrzyniak, A. Ochmann, C. Höbartner, *Bioorganic & Medicinal Chemistry* **2013**, *21*, 6171-6180.
- [4] P. Brookes, P. D. Lawley, *J. Chem. Soc.* **1962**, 1348-1351.
- [5] X.-F. Zhu, H. J. Williams, A. I. Scott, *Synthetic Communications* **2003**, *33*, 1233-1243.
- [6] M. Ghaem Maghami, C. P. M. Scheitl, C. Höbartner, *Journal of the American Chemical Society* **2019**, *141*, 19546-19549.
- [7] a) C. Zhou, J. L. Avins, P. C. Klauser, B. M. Brandsen, Y. Lee, S. K. Silverman, *Journal of the American Chemical Society* **2016**, *138*, 2106-2109; b) J. Chandrasekar, S. K. Silverman, *Proceedings of the National Academy of Sciences* **2013**, *110*, 5315.
- [8] a) M. V. Sednev, V. Mykhailiuk, P. Choudhury, J. Halang, K. E. Sloan, M. T. Bohnsack, C. Höbartner, *Angewandte Chemie International Edition* **2018**, *57*, 15117-15121; b) A. Liaqat, C. Stiller, M. Michel, M. V. Sednev, C. Höbartner, *Angewandte Chemie International Edition* **2020**, *59*, 18627-18631.
